# Supplementary material
Source: PubMed Central journal article supplement (PMC2689760)
Supplement: M800226-MCP200_1.pdf [file M800226-MCP200_1.pdf]

## SUPPLEMENTAL DATA

### SUPPLEMENTAL FIGURES

#### Figure S1. Experimental strategy to probe selective enrichment of PKA isoforms and their interacting partners using stable isotope labeling.

Following the parallel affinity enrichments using C8 and C2, C8\_OCH<sub>3</sub> and EtOH beads, proteins were digested in-solution. The tryptic peptides originating from the pull-down using the C8 beads were chemically labeled using CD<sub>2</sub>O ('heavy-label') whereas those originating from C2, C8\_OCH<sub>3</sub>, EtOH beads were labeled with CH<sub>2</sub>O ('light-label'). Each set of CD<sub>2</sub>O and CH<sub>2</sub>O labeled samples were mixed in a 1:1 ratio and then analyzed by LC-coupled nanospray LTQ-FT-ICR mass spectrometry for protein identification and quantification.

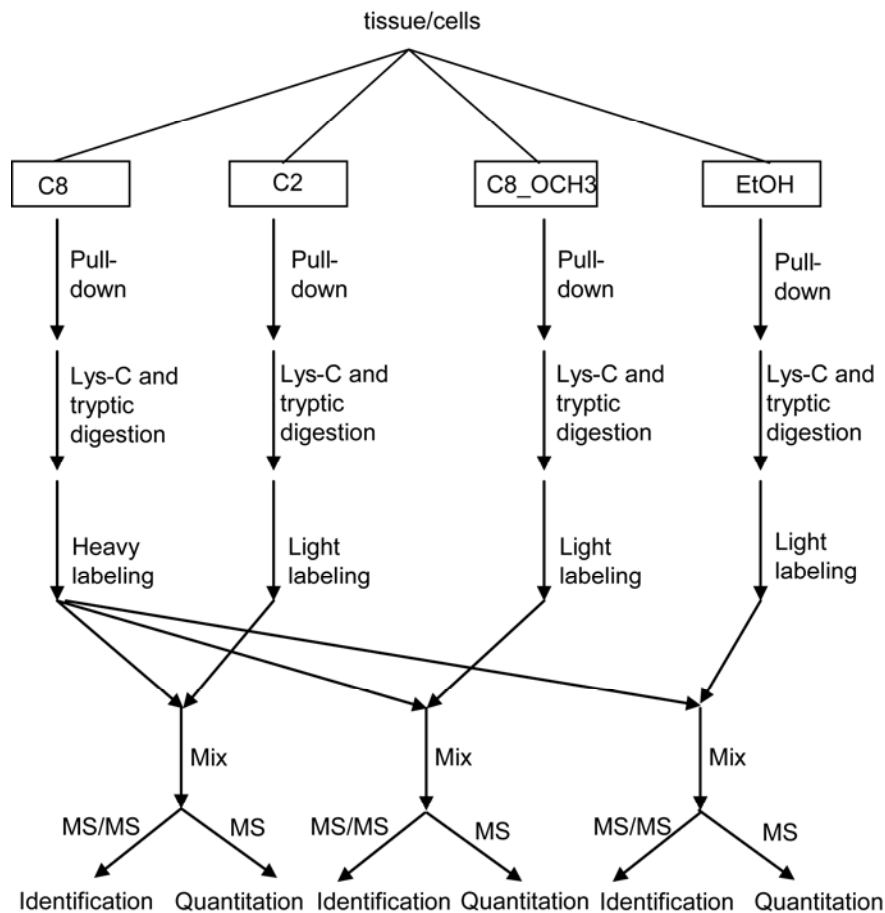

**Figure S2. Binding specificity patterns of the  $\beta$ -type PKA regulatory isoforms and PKG**

C2 vs. C8 (white bars) and C8 vs. C8\_OCH<sub>3</sub> (grey bars) enrichment ratios for (A) PKA RII $\beta$ , (B) PKA RI $\beta$  and (C) PKG. For PKG we were unable to unambiguously identify which type I isoform was quantitated, I $\alpha$  or I $\beta$  due to lack of proteotypic peptides for these isoforms

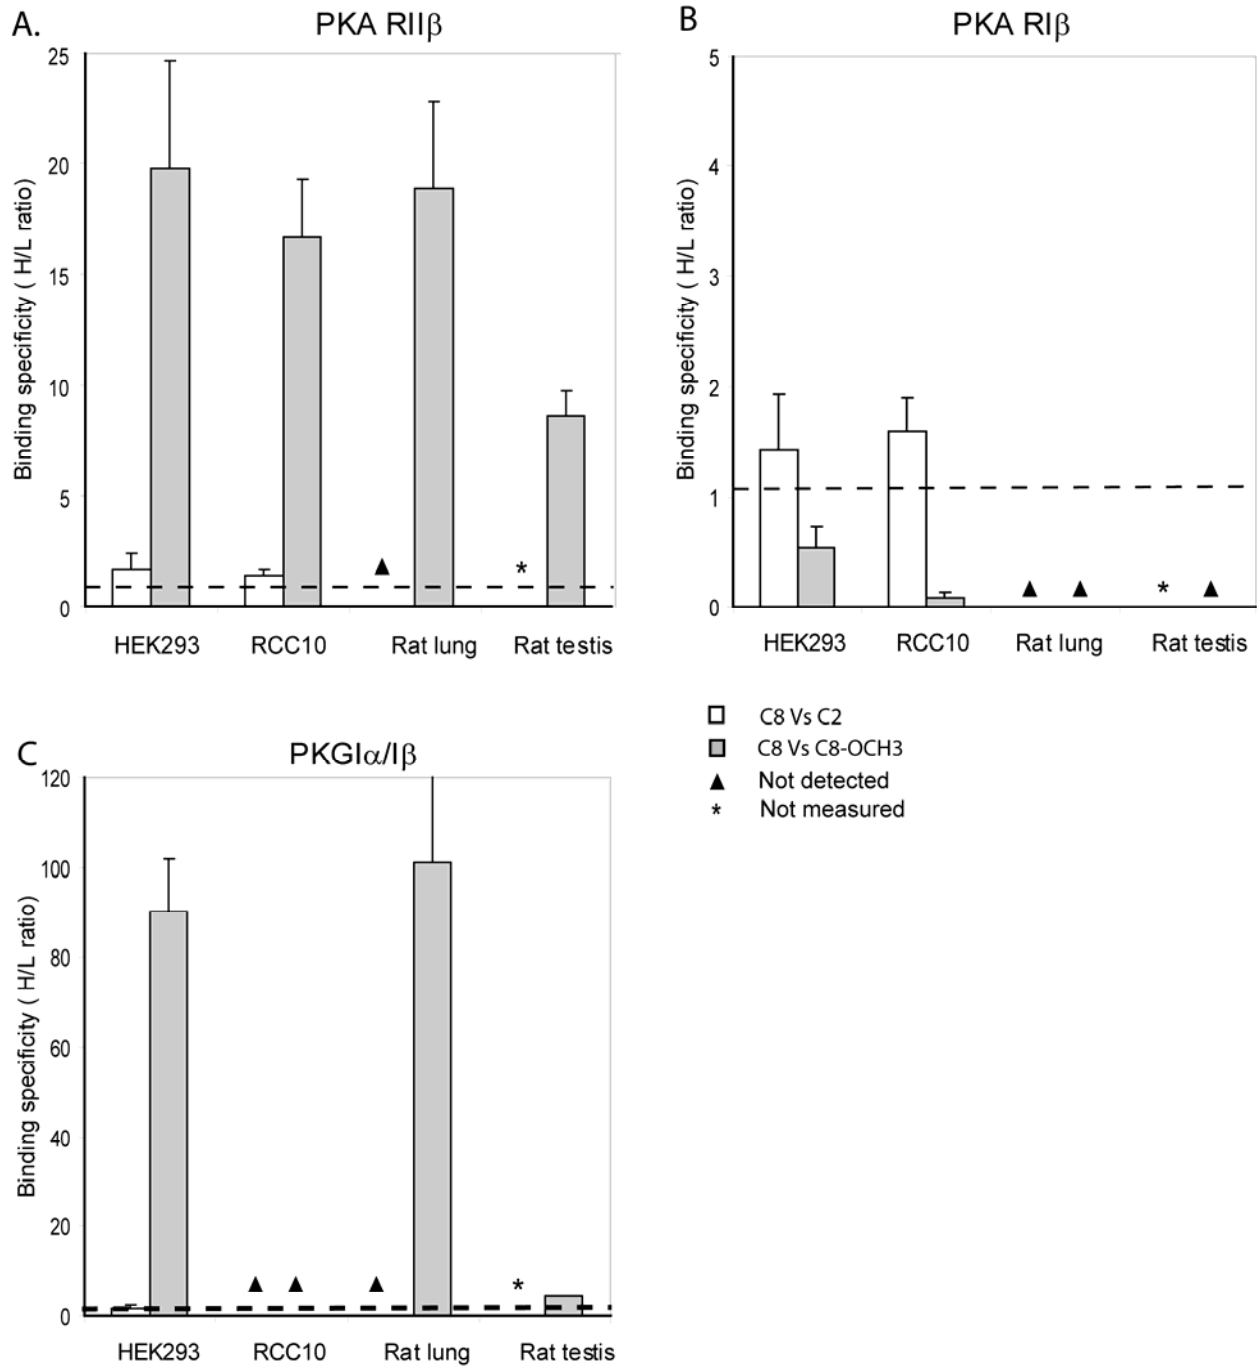

**Figure S3. Binding specificity patterns of AKAP7 and AKAP2**

Acquired ratios C8 vs. C2 (white) and C8 vs. C8\_OCH<sub>3</sub> (grey) for AKAP7 (A) and AKAP2 (B) show consistent RII and dual specificity respectively in three different lysates.

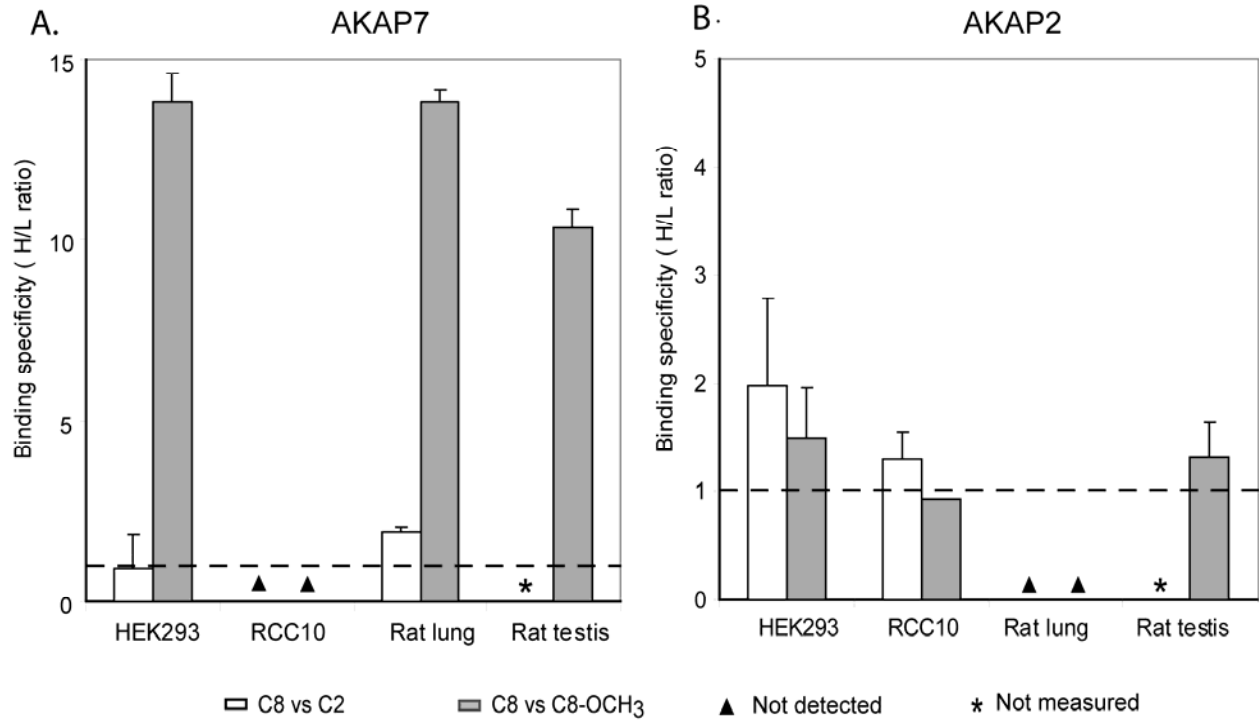

**Figure S4. XIC and tandem mass spectrum of single peptide identification AKAP10.**

A. Extracted ion chromatogram of peptide SIEQDAVNTFTK (AKAP10) in rat lung tissue. Maximum intensities of  $1.2 \times 10^6$  and  $8.6 \times 10^5$  for heavy and light labeled peptide respectively are ample for confident quantitation. B. Annotated tandem MS spectrum of SIEQDAVNTFTK which had a MASCOT score of 59 and a MASCOT delta score of 47, i.e. the next best peptide hit in MASCOT had a score of 12.

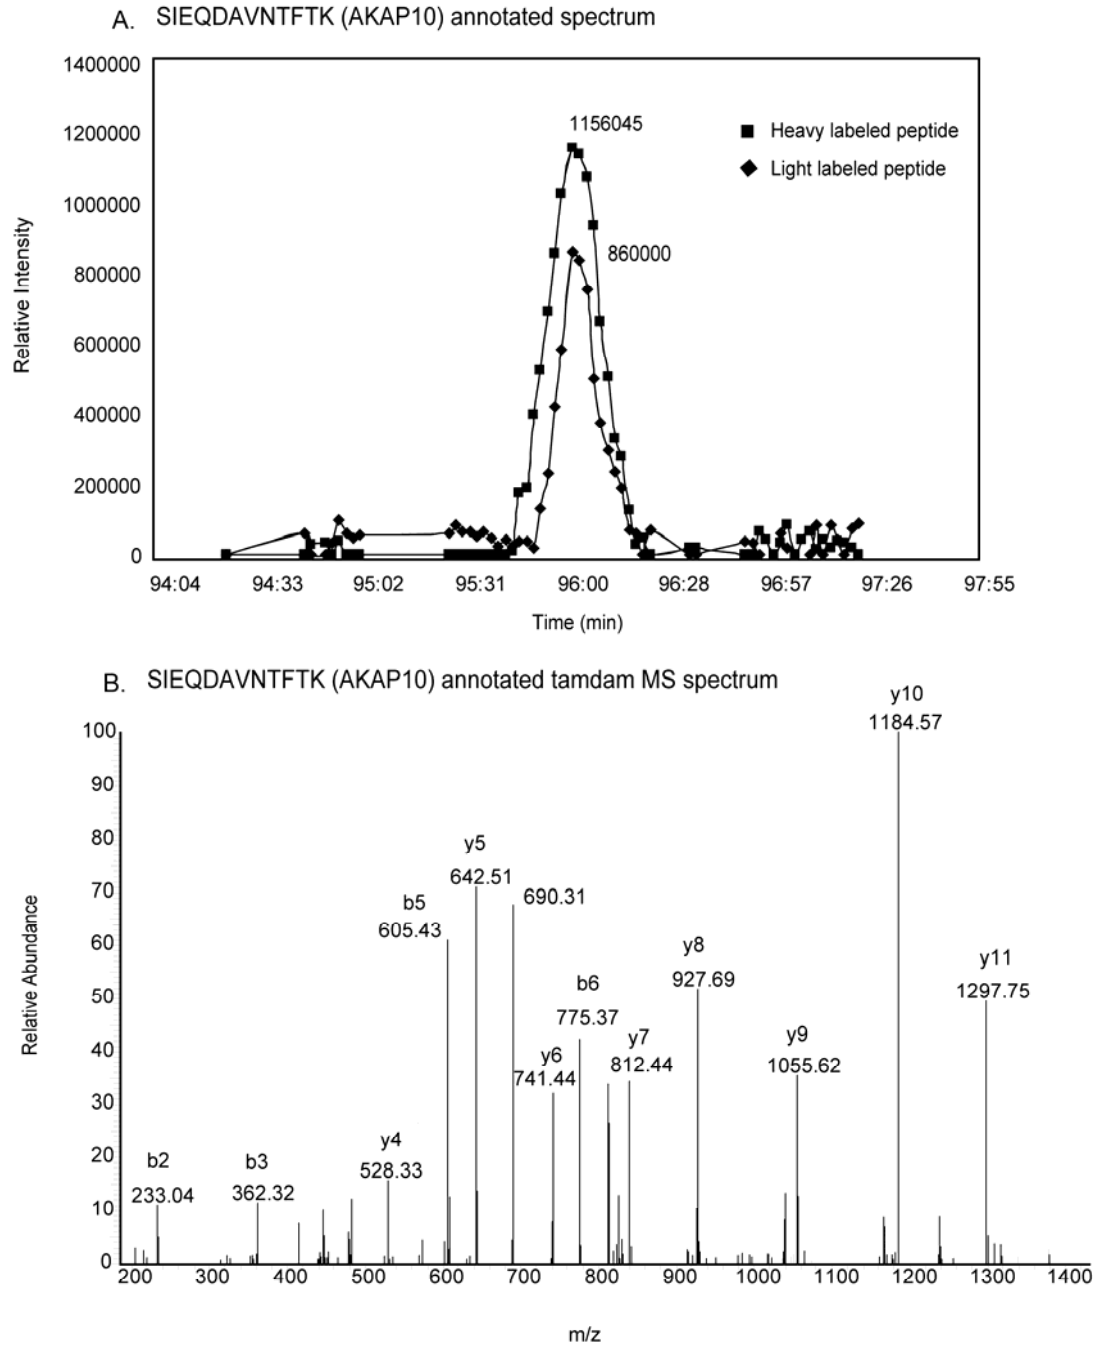

## SUPPLEMENTAL TABLES

**Table S1.** Ratios and peptide counts for PKA R isoforms and AKAPs as observed in a duplicate pull down experiment using C8 vs. C8\_OCH<sub>3</sub> beads with rat testis tissue lysate as input.

**Table S2.** List of proteins identified by in-gel digestion of 1D SDS-PAGE gel shown in Figure 1. For each of the different cAMP-beads (C8-, C2-, C8-OCH<sub>3</sub>-cAMP-agarose) the amount of unique peptides found for the identification of a protein are shown, as well as their Mascot protein score.

**Table S3.** All proteins detected and quantified depicted with their identified and quantified peptides, with each of the bead combinations used in this study (i.e. C8, C2, C8\_OCH<sub>3</sub>, EtOH). Each protein is described with accession number, molecular weight, protein Mascot score, identified peptide sequence(s) and protein specificity ratio with respective standard deviation. For all peptide pairs used ratios are detailed. The protein differential binding ratio was calculated by averaging over all peptide pairs measured for that particular protein. The binding specificity ratio of C8 vs C2 in HEK293 are in **S3A** whereas **S3B** is for the binding specificity ratio of C8 against C8-OCH<sub>3</sub>. The data of C8 vs Control are in **S3C**. Likewise, for rat lung tissue samples, the binding specificity ratio of C8 vs C2, C8-OCH<sub>3</sub> and Control are depicted in **S3D**, **S3E**, and **S3F** respectively. For RCC10 cells, the data of C8 vs C2 and C8 vs C8-OCH<sub>3</sub> are shown in table **S3G** and **S3H**. The data obtained by setting off C8 and C8-OCH<sub>3</sub> in rat testis tissue are summarized in table **S3I**.

## Supplemental Table S1

Ratios with quantified peptide counts observed in a duplicate pull down experiments

| Accession # | MW     | Protein Name | #of quantified peptides in Exp1 | Protein ratio1 | # of quantified peptides in Exp2 | Protein ratio2 | Stdev |
|-------------|--------|--------------|---------------------------------|----------------|----------------------------------|----------------|-------|
| IPI00196684 | 45797  | PKA RIla     | 10                              | 10.6           | 10                               | 7.4            | 2.3   |
| IPI00764045 | 44984  | PKA RIlb     | 6                               | 9.6            | 9                                | 7.2            | 1.7   |
| IPI00779281 | 209546 | AKAP11       | 5                               | 8.3            | 8                                | 8.1            | 0.2   |
| IPI00231052 | 49327  | MAP2         | 3                               | 6.2            | 3                                | 6.0            | 0.1   |
| IPI00212365 | 94916  | AKAP4        | 7                               | 3.0            | 13                               | 3.9            | 0.6   |
| IPI00201274 | 96002  | AKAP3        | 3                               | 2.7            | 8                                | 3.1            | 0.3   |
| IPI00198250 | 181514 | AKAP12       | 5                               | 1.7            | 3                                | 1.9            | 0.1   |
| IPI00364858 | 96338  | AKAP2        | 4                               | 1.3            | 3                                | 1.6            | 0.2   |
| IPI00471827 | 74284  | AKAP10       | 1                               | 1.2            | 1                                | 1.3            | 0.1   |
| IPI00213479 | 92660  | AKAP1        | 3                               | 1.1            | 2                                | 1.1            | 0.0   |
| IPI00231770 | 43296  | PKA RIa      | 4                               | 0.7            | 7                                | 0.6            | 0.0   |

## Supplemental Table S2

## Proteins identified from rat lung tissue pulldown with 3 differently coupled cAMP analogues

Confirmed cyclic nucleotide binding protein or one of its interactors

|    | Accession   | Protein Name                                                          | MW     | C8                   |                      | C2                   |                      | C8_OCH3              |                      | Total # of Peptides |
|----|-------------|-----------------------------------------------------------------------|--------|----------------------|----------------------|----------------------|----------------------|----------------------|----------------------|---------------------|
|    |             |                                                                       |        | # of Unique Peptides | ProteinM ascot Score | # of Unique Peptides | Protein Mascot Score | # of Unique Peptides | Protein Mascot Score |                     |
| 1  | IPI00231770 | PKA RI $\alpha$                                                       | 42947  | 32                   | 13163                | 35                   | 7584                 | 23                   | 1028                 | 90                  |
| 2  | IPI00215470 | AKAP5                                                                 | 75941  | 31                   | 9138                 | 36                   | 9837                 | 16                   | 7550                 | 83                  |
| 3  | IPI00196684 | PKA RI $\alpha$                                                       | 45392  | 34                   | 21665                | 31                   | 14494                | 18                   | 12907                | 83                  |
| 4  | IPI00766097 | PKG I $\alpha$                                                        | 76336  | 39                   | 4852                 | 35                   | 5288                 | 6                    | 1634                 | 80                  |
| 5  | IPI00365600 | PKA RI $\beta$                                                        | 45974  | 28                   | 14736                | 34                   | 10346                | 13                   | 980                  | 75                  |
| 6  | IPI00360386 | similar to heterogeneous nuclear ribonucleoprotein U isoform a        | 97171  | 29                   | 2360                 | 17                   | 1575                 | 14                   | 1256                 | 60                  |
| 7  | IPI00779281 | AKAP11                                                                | 206636 | 25                   | 1288                 | 23                   | 1096                 | 11                   | 975                  | 59                  |
| 8  | IPI00409539 | similar to Filamin-A                                                  | 281264 | 27                   | 685                  | 23                   | 707                  | 5                    | 650                  | 55                  |
| 9  | IPI00764064 | NS1-associated protein 1 isoform 2                                    | 62655  | 17                   | 1234                 | 21                   | 1495                 | 15                   | 1301                 | 53                  |
| 10 | IPI00362975 | SKIP                                                                  | 197419 | 10                   | 323                  | 19                   | 617                  | 18                   | 539                  | 47                  |
| 11 | IPI00769072 | similar to AHNAK nucleoprotein isoform 1 isoform 2                    | 588348 | 13                   | 342                  | 21                   | 616                  | 10                   | 340                  | 44                  |
| 12 | IPI00208697 | Rap guanine nucleotide exchange factor 4 (cAMP-regulated guanine      | 123438 | 27                   | 938                  | 0                    | 0                    | 15                   | 722                  | 42                  |
| 13 | IPI00210090 | SP120                                                                 | 87731  | 14                   | 364                  | 18                   | 34                   | 10                   | 230                  | 42                  |
| 14 | IPI00191090 | Biglycan precursor                                                    | 41691  | 17                   | 2515                 | 14                   | 3585                 | 8                    | 1230                 | 39                  |
| 15 | IPI00199861 | Decorin precursor                                                     | 39789  | 8                    | 280                  | 18                   | 1717                 | 10                   | 1438                 | 36                  |
| 16 | IPI00212868 | Laminin subunit beta-2 precursor                                      | 196450 | 0                    | 0                    | 31                   | 1215                 | 0                    | 0                    | 31                  |
| 17 | IPI00211448 | EH-domain containing 2                                                | 61221  | 4                    | 113                  | 14                   | 579                  | 12                   | 1009                 | 30                  |
| 18 | IPI00199076 | PDE2A3                                                                | 104648 | 2                    | 77                   | 25                   | 1574                 | 0                    | 0                    | 27                  |
| 19 | IPI00208205 | Heat shock cognate 71 kDa protein                                     | 70855  | 13                   | 507                  | 7                    | 473                  | 6                    | 470                  | 26                  |
| 20 | IPI00200271 | Pincher                                                               | 61452  | 3                    | 230                  | 10                   | 544                  | 10                   | 357                  | 23                  |
| 21 | IPI00231783 | L-lactate dehydrogenase B chain                                       | 36463  | 14                   | 495                  | 0                    | 0                    | 8                    | 560                  | 22                  |
| 22 | IPI00361106 | similar to Laminin alpha-4 chain precursor                            | 201509 | 2                    | 28                   | 19                   | 585                  | 0                    | 0                    | 21                  |
| 23 | IPI00778167 | Moesin                                                                | 67636  | 5                    | 195                  | 9                    | 248                  | 6                    | 230                  | 20                  |
| 24 | IPI00201347 | Histidine-rich glycoprotein 1                                         | 59029  | 12                   | 365                  | 7                    | 465                  | 1                    | 94                   | 20                  |
| 25 | IPI00471584 | Heat shock protein HSP 90-beta                                        | 83135  | 12                   | 555                  | 5                    | 204                  | 2                    | 193                  | 19                  |
| 26 | IPI00188885 | Isoform 1 of Agrin precursor                                          | 208621 | 0                    | 0                    | 18                   | 1374                 | 0                    | 0                    | 18                  |
| 27 | IPI00396910 | ATP synthase subunit alpha, mitochondrial precursor                   | 59737  | 4                    | 215                  | 7                    | 442                  | 7                    | 346                  | 18                  |
| 28 | IPI00366485 | Nitric oxide synthase trafficker                                      | 57336  | 5                    | 189                  | 9                    | 272                  | 4                    | 174                  | 18                  |
| 29 | IPI00362014 | Tin1 protein                                                          | 271021 | 4                    | 134                  | 9                    | 296                  | 4                    | 149                  | 17                  |
| 30 | IPI00767541 | PKG I $\beta$                                                         | 77776  | 6                    | 3128                 | 8                    | 3089                 | 3                    | 1821                 | 17                  |
| 31 | IPI00551812 | ATP synthase subunit beta, mitochondrial precursor                    | 56336  | 4                    | 108                  | 6                    | 236                  | 7                    | 217                  | 17                  |
| 32 | IPI00324102 | fibrinogen-like 2                                                     | 48638  | 5                    | 152                  | 8                    | 456                  | 4                    | 134                  | 17                  |
| 33 | IPI00212647 | GAPDH                                                                 | 35765  | 10                   | 470                  | 3                    | 153                  | 4                    | 143                  | 17                  |
| 34 | IPI00194728 | Integrin-linked protein kinase                                        | 51356  | 5                    | 144                  | 5                    | 205                  | 5                    | 260                  | 15                  |
| 35 | IPI00201032 | Isoform 1 of Heterogeneous nuclear ribonucleoprotein D0               | 38174  | 13                   | 661                  | 1                    | 87                   | 1                    | 56                   | 15                  |
| 36 | IPI00365769 | similar to Ras GTPase-activating-like protein IQGAP1                  | 200475 | 3                    | 71                   | 7                    | 324                  | 4                    | 298                  | 14                  |
| 37 | IPI00201262 | Alpha-1-inhibitor 3 precursor                                         | 163756 | 2                    | 84                   | 11                   | 315                  | 1                    | 78                   | 14                  |
| 38 | IPI00364858 | AKAP2                                                                 | 95923  | 5                    | 235                  | 4                    | 218                  | 5                    | 265                  | 14                  |
| 39 | IPI00326948 | Hsd17b4 protein                                                       | 81072  | 2                    | 74                   | 9                    | 374                  | 2                    | 56                   | 13                  |
| 40 | IPI00201969 | Vesicle amine transport protein 1 homolog                             | 43100  | 4                    | 156                  | 5                    | 185                  | 4                    | 167                  | 13                  |
| 41 | IPI00364348 | AKAP13                                                                | 303758 | 4                    | 130                  | 4                    | 99                   | 4                    | 125                  | 12                  |
| 42 | IPI00231136 | similar to Nidogen-1 precursor                                        | 137020 | 0                    | 0                    | 12                   | 514                  | 0                    | 0                    | 12                  |
| 43 | IPI00231381 | Major vault protein                                                   | 96806  | 4                    | 67                   | 6                    | 114                  | 2                    | 98                   | 12                  |
| 44 | IPI00197711 | L-lactate dehydrogenase A chain                                       | 36433  | 7                    | 452                  | 0                    | 0                    | 5                    | 398                  | 12                  |
| 45 | IPI00388249 | Calpain-2 catalytic subunit precursor                                 | 79773  | 4                    | 91                   | 2                    | 48                   | 5                    | 300                  | 11                  |
| 46 | IPI00195372 | Elongation factor 1-alpha 1                                           | 50096  | 4                    | 261                  | 4                    | 167                  | 3                    | 230                  | 11                  |
| 47 | IPI00200225 | Fibromodulin precursor                                                | 43203  | 4                    | 72                   | 3                    | 144                  | 4                    | 265                  | 11                  |
| 48 | IPI00421832 | Dermcidin                                                             | 11266  | 4                    | 862                  | 4                    | 382                  | 3                    | 632                  | 11                  |
| 49 | IPI00190577 | similar to Laminin alpha-5 chain precursor                            | 404413 | 0                    | 0                    | 10                   | 345                  | 0                    | 0                    | 10                  |
| 50 | IPI00480639 | Complement C3 precursor                                               | 186444 | 2                    | 240                  | 6                    | 220                  | 2                    | 135                  | 10                  |
| 51 | IPI00326140 | Alpha-1-macroglobulin precursor                                       | 167108 | 2                    | 59                   | 6                    | 147                  | 2                    | 137                  | 10                  |
| 52 | IPI00208193 | Nucleic acid binding factor pRM10                                     | 33798  | 9                    | 471                  | 0                    | 0                    | 1                    | 69                   | 10                  |
| 53 | IPI00328073 | cGMP-specific 3',5'-cyclic phosphodiesterase (PDE10A11)               | 98326  | 0                    | 0                    | 9                    | 275                  | 0                    | 0                    | 9                   |
| 54 | IPI00192034 | similar to Dihydropyrimidinase-related protein 2                      | 73143  | 3                    | 138                  | 3                    | 174                  | 3                    | 198                  | 9                   |
| 55 | IPI00194562 | Heterogeneous nuclear ribonucleoprotein R                             | 70858  | 5                    | 541                  | 0                    | 579                  | 4                    | 195                  | 9                   |
| 56 | IPI00767522 | similar to sparc/osteonectin, cwcv and kazal-like domains proteoglyca | 46801  | 0                    | 0                    | 9                    | 281                  | 0                    | 0                    | 9                   |
| 57 | IPI00421609 | AKAP7                                                                 | 39401  | 4                    | 346                  | 3                    | 77                   | 2                    | 67                   | 9                   |
| 58 | IPI00200661 | Fatty acid synthase                                                   | 272633 | 2                    | 66                   | 6                    | 122                  | 0                    | 0                    | 8                   |
| 59 | IPI00210319 | Isoform IIBA of Dynamin-2                                             | 98232  | 4                    | 83                   | 0                    | 0                    | 3                    | 211                  | 7                   |
| 60 | IPI00190240 | Ribosomal protein S27a                                                | 17934  | 3                    | 173                  | 2                    | 39                   | 2                    | 31                   | 7                   |
| 61 | IPI00214232 | Oxysterol-binding protein-related protein 6                           | 108989 | 0                    | 0                    | 6                    | 156                  | 0                    | 0                    | 6                   |
| 62 | IPI00327185 | nucleosome assembly protein 1-like 1                                  | 45356  | 0                    | 0                    | 6                    | 118                  | 0                    | 0                    | 6                   |
| 63 | IPI00200327 | PKA RI $\beta$                                                        | 43133  | 2                    | 2007                 | 2                    | 1184                 | 2                    | 1268                 | 6                   |
| 64 | IPI00195522 | PDE4dip                                                               | 261914 | 0                    | 0                    | 5                    | 148                  | 0                    | 0                    | 5                   |
| 65 | IPI00365665 | similar to EIB-55kDa associated protein 5 isoform 1 isoform 3         | 95985  | 3                    | 46                   | 2                    | 33                   | 0                    | 0                    | 5                   |
| 66 | IPI00231827 | Nucleolin                                                             | 77259  | 0                    | 0                    | 5                    | 270                  | 0                    | 0                    | 5                   |
| 67 | IPI00551815 | Ybx1 protein                                                          | 36182  | 0                    | 0                    | 5                    | 159                  | 0                    | 0                    | 5                   |
| 68 | IPI00210566 | Heat shock protein HSP 90-alpha                                       | 84669  | 3                    | 318                  | 1                    | 127                  | 0                    | 0                    | 4                   |

|                                                                               |             |                                                                      |        |           |     |           |     |           |    |   |
|-------------------------------------------------------------------------------|-------------|----------------------------------------------------------------------|--------|-----------|-----|-----------|-----|-----------|----|---|
| 69                                                                            | IPI00362106 | Pleckstrin homology domain containing, family C (With FERM domain    | 77861  | 3         | 74  | 1         | 39  | 0         | 0  | 4 |
| 70                                                                            | IPI00213019 | AKAP14                                                               | 55736  | 2         | 48  | 1         | 31  | 1         | 30 | 4 |
| 71                                                                            | IPI00361733 | similar to sushi-repeat containing protein                           | 52835  | 3         | 64  | 1         | 29  | 0         | 0  | 4 |
| 72                                                                            | IPI00366081 | similar to desmoplakin isoform I isoform 2                           | 332383 | 3         | 119 | 0         | 0   | 0         | 0  | 3 |
| 73                                                                            | IPI00363974 | Gelsolin                                                             | 86268  | 3         | 113 | 0         | 0   | 0         | 0  | 3 |
| 74                                                                            | IPI00206624 | 78 kDa glucose-regulated protein precursor                           | 72331  | 3         | 148 | 0         | 0   | 0         | 0  | 3 |
| 75                                                                            | IPI00189074 | Polyadenylate-binding protein 1                                      | 70683  | 0         | 0   | 3         | 74  | 0         | 0  | 3 |
| 76                                                                            | IPI00187885 | Fibronectin type-III domain-containing protein C4orf31 homolog precu | 64584  | 0         | 0   | 3         | 129 | 0         | 0  | 3 |
| 77                                                                            | IPI00210120 | Aa1018                                                               | 55943  | 0         | 0   | 3         | 128 | 0         | 0  | 3 |
| 78                                                                            | IPI00358059 | Aspartyl aminopeptidase                                              | 52538  | 0         | 0   | 3         | 153 | 0         | 0  | 3 |
| 79                                                                            | IPI00190759 | Isoform Gamma-B of Fibrinogen gamma chain precursor                  | 50616  | 0         | 0   | 3         | 149 | 0         | 0  | 3 |
| 80                                                                            | IPI00204899 | Septin-7                                                             | 50490  | 0         | 0   | 3         | 87  | 0         | 0  | 3 |
| 81                                                                            | IPI00231615 | Annexin A1                                                           | 38682  | 3         | 103 | 0         | 71  | 0         | 0  | 3 |
| 82                                                                            | IPI00231865 | Cytochrome c, testis-specific                                        | 11594  | 3         | 48  | 0         | 0   | 0         | 0  | 3 |
| <b>Total proteins (Number of unique peptide &gt;3 and Mascot score&gt;30)</b> |             |                                                                      |        | <b>56</b> |     | <b>62</b> |     | <b>40</b> |    |   |



Supplemental Table S3 (A)

Hek293\_Binding specificity ratio\_C8\_C2

|    | Accession   | MW     | Protein Name                  | Peptide Sequence       | Peptide Score | Peptide C8/C2 ratio | StDev | Protein Score | Protein C8/C2 ratio | StDev |
|----|-------------|--------|-------------------------------|------------------------|---------------|---------------------|-------|---------------|---------------------|-------|
| 1  | IP100063234 | 43998  | PKA RII $\alpha$              | AASAYAVGDVK            | 99            | 1.2                 | 1.11  | 905           | 1.7                 | 0.98  |
|    |             |        |                               | AATIVATSEGLWGLDR       | 127           | 1.1                 | 0.38  |               |                     |       |
|    |             |        |                               | CLVMDVQAFER            | 78            | 2.2                 | 1.49  |               |                     |       |
|    |             |        |                               | DGGNQEVEIAR            | 81            | 1.1                 | 0.21  |               |                     |       |
|    |             |        |                               | GSFGELALMYNTPR         | 94            | 1.2                 | 0.00  |               |                     |       |
|    |             |        |                               | IVDVIGEK               | 42            | 1.3                 | 0.81  |               |                     |       |
|    |             |        |                               | MFESFIESVPLLK          | 51            | 1.6                 | 0.55  |               |                     |       |
|    |             |        |                               | NISHYEEQLVK            | 53            | 1.0                 | 0.00  |               |                     |       |
|    |             |        |                               | NLDQEQLSQVLDAMFER      | 115           | 1.2                 | 0.20  |               |                     |       |
|    |             |        |                               | QSLGHPPPEPGPDR         | 50            | 1.1                 | 0.60  |               |                     |       |
| 2  | IP100021831 | 43828  | PKA RI $\alpha$               | ECELYVQK               | 45            | 1.8                 | 1.30  | 306           | 1.4                 | 0.31  |
|    |             |        |                               | HNIQALLK               | 52            | 1.2                 | 0.60  |               |                     |       |
|    |             |        |                               | LTVADALEPVQFEDGQK      | 138           | 1.1                 | 0.00  |               |                     |       |
| 3  | IP100456775 | 47317  | PKA RII $\beta$               | AASAHAIQTVK            | 65            | 2.6                 | 0.82  | 728           | 1.7                 | 0.75  |
|    |             |        |                               | AATITATSPGALWGLDR      | 61            | 1.8                 | 0.20  |               |                     |       |
|    |             |        |                               | ASVCAEAYNPDEEEDDAESR   | 102           | 1.3                 | 0.36  |               |                     |       |
|    |             |        |                               | DILLFK                 | 28            | 0.7                 | 1.60  |               |                     |       |
|    |             |        |                               | GTFDIYVK               | 59            | 2.4                 | 0.97  |               |                     |       |
|    |             |        |                               | SEVEENGAVEIAR          | 69            | 2.0                 | 0.76  |               |                     |       |
|    |             |        |                               | TWGDLAGAAGGGTPSK       | 121           | 0.8                 | 1.72  |               |                     |       |
| 4  | IP100554488 | 44043  | PKA RI $\beta$                | SNSQSDSHDEEVSPTPPNPVVK | 50            | 1.4                 | 0.72  | 70            | 1.4                 | 0.72  |
| 5  | IP100427586 | 78494  | PKG I $\alpha$ / PKGI $\beta$ | AQGISAEPQTYR           | 71            | 0.8                 | 0.26  | 398           | 1.2                 | 0.58  |
|    |             |        |                               | GDTFFIISK              | 76            | 1.0                 | 0.72  |               |                     |       |
|    |             |        |                               | GIDMIEFPK              | 53            | 1.0                 | 0.37  |               |                     |       |
|    |             |        |                               | HLIGGLDDVSNK           | 71            | 1.0                 | 3.47  |               |                     |       |
|    |             |        |                               | YEAEAAFFANLK           | 69            | 2.2                 | 0.10  |               |                     |       |
| 6  | IP100022585 | 99512  | AKAP1                         | ETGGAEGTGDAVLGEK       | 104           | 1.5                 | 0.78  | 260           | 1.1                 | 0.37  |
|    |             |        |                               | VLEEALLSR              | 48            | 0.7                 | 0.50  |               |                     |       |
|    |             |        |                               | VVSTPPSVTEPPEK         | 32            | 1.2                 | 0.59  |               |                     |       |
| 7  | IP100032064 | 124528 | AKAP2                         | SPGALETPSAAGSQGTASQGK  | 96            | 1.4                 | 0.86  | 259           | 2.0                 | 0.81  |
|    |             |        |                               | STASLLATQESDVMVGPFK    | 133           | 2.6                 | 0.48  |               |                     |       |
| 8  | IP100307794 | 48534  | AKAP5                         | DGDEVCESNVNSITSGEK     | 101           | 1.1                 | 0.50  | 47            | 1.1                 | 0.50  |
| 9  | IP100422254 | 38160  | AKAP7                         | IDLCSMLK               | 37            | 0.3                 | 0.94  | 109           | 0.9                 | 0.91  |
|    |             |        |                               | LAEGDHVNSLLEIAETANR    | 72            | 1.6                 | 0.78  |               |                     |       |
| 10 | IP100019223 | 465228 | AKAP9                         | ACMFEPLPIK             | 49            | 3.8                 | 1.20  | 1650          | 3.3                 | 1.18  |
|    |             |        |                               | ALEIDVEEQVSR           | 82            | 1.3                 | 1.24  |               |                     |       |
|    |             |        |                               | ALNEELHLQR             | 50            | 3.6                 | 0.10  |               |                     |       |
|    |             |        |                               | DLELTQCYK              | 48            | 2.2                 | 1.38  |               |                     |       |
|    |             |        |                               | ETEQNYEAEIHCLQK        | 54            | 3.6                 | 0.97  |               |                     |       |
|    |             |        |                               | EVEIDQLNEQVTK          | 94            | 4.0                 | 1.41  |               |                     |       |
|    |             |        |                               | FIELEQEK               | 43            | 1.0                 | 0.53  |               |                     |       |
|    |             |        |                               | HGEISFLNEEVK           | 35            | 4.2                 | 1.64  |               |                     |       |
|    |             |        |                               | LALEQQVETANEEMTFMK     | 104           | 3.1                 | 0.80  |               |                     |       |
|    |             |        |                               | LIEMNGGGTGCNHELEMIR    | 45            | 3.4                 | 0.36  |               |                     |       |
|    |             |        |                               | LMNVAINELNIK           | 66            | 3.2                 | 0.56  |               |                     |       |
|    |             |        |                               | LSQDQIGFQTFETVDVK      | 117           | 3.2                 | 0.41  |               |                     |       |
|    |             |        |                               | MAESQEAELER            | 54            | 4.6                 | 0.99  |               |                     |       |
|    |             |        |                               | MLYDAQLSEEQGR          | 58            | 2.5                 | 1.26  |               |                     |       |
|    |             |        |                               | QAHAVCQQEQHYFNEMK      | 39            | 4.4                 | 0.64  |               |                     |       |
|    |             |        |                               | QSQMLEMQVELSSMK        | 81            | 4.6                 | 0.16  |               |                     |       |
|    |             |        |                               | SIASQTDGTLK            | 64            | 3.5                 | 1.63  |               |                     |       |
|    |             |        |                               | SSIDNENLVSER           | 63            | 3.1                 | 1.47  |               |                     |       |
|    |             |        |                               | SVLLAAFR               | 56            | 3.2                 | 1.57  |               |                     |       |
|    |             |        |                               | TTAAVEETIGR            | 64            | 3.4                 | 1.44  |               |                     |       |
|    |             |        |                               | YEVQDFQENMHTLLNK       | 50            | 1.0                 | 0.71  |               |                     |       |
| 11 | IP100007411 | 217039 | AKAP11                        | AAVSVDNLIK             | 87            | 1.2                 | 1.07  | 499           | 1.7                 | 0.79  |
|    |             |        |                               | EFMLLSK                | 38            | 1.4                 | 1.04  |               |                     |       |
|    |             |        |                               | FAADLVEK               | 40            | 1.7                 | 1.00  |               |                     |       |
|    |             |        |                               | FPDSQNQLTHCSLSAAK      | 30            | 1.3                 | 0.67  |               |                     |       |
|    |             |        |                               | NPCLNVQSQR             | 33            | 3.6                 | 1.51  |               |                     |       |
|    |             |        |                               | SISCEVLGSVLR           | 82            | 1.9                 | 0.28  |               |                     |       |
|    |             |        |                               | SQCDAASQTVTGHLETHDLK   | 60            | 0.8                 | 0.78  |               |                     |       |
|    |             |        |                               | SVIPNIDK               | 28            | 1.6                 | 0.99  |               |                     |       |
| 12 | IP100304925 | 71724  | Heat shock 70 kDa protein 1   | ATAGDTHLGGEDFDNR       | 73            | 0.9                 | 0.52  | 516           | 1.1                 | 0.24  |
|    |             |        |                               | DAGVIAGLNVLR           | 80            | 1.2                 | 1.22  |               |                     |       |
|    |             |        |                               | IINEPTAAAIAYGLDR       | 107           | 1.3                 | 1.65  |               |                     |       |
|    |             |        |                               | NQVALNPQNTVFDK         | 68            | 1.6                 | 0.49  |               |                     |       |
|    |             |        |                               | TTPSYVAFTDTER          | 49            | 0.9                 | 1.39  |               |                     |       |
|    |             |        |                               | VEIIANDQGNR            | 53            | 0.9                 | 0.77  |               |                     |       |
| 13 | IP100011654 | 50544  | Tubulin beta-2 chain          | AILDLEPGTMDSVR         | 107           | 1.3                 | 0.37  | 466           | 1.6                 | 0.32  |

|    |             |        |                                    |     |       |        |     |       |       |
|----|-------------|--------|------------------------------------|-----|-------|--------|-----|-------|-------|
|    |             |        | EAESCDCLQGFQLTHSLGGGTGSGMGTL       | 127 | 1.4   | 1.55   |     |       |       |
|    |             |        | FWEVISDEHGIDPTGTYHGSDQLDR          | 37  | 2.2   | 1.18   |     |       |       |
|    |             |        | ISEQFTAMFR                         | 31  | 1.3   | 1.84   |     |       |       |
|    |             |        | LAVNMVPPFR                         | 66  | 1.6   | 0.96   |     |       |       |
|    |             |        | NSSYFVEWIPNNVK                     | 58  | 1.8   | 1.07   |     |       |       |
|    |             |        | TAVCDIPPR                          | 40  | 1.4   | 0.66   |     |       |       |
| 14 | IP100166768 | 38214  | TUBA6 protein                      | 74  | 1.7   | 0.00   | 365 | 1.7   | 0.19  |
|    |             |        | EIIDLVDR                           | 64  | 1.9   | 6.69   |     |       |       |
|    |             |        | TIGGGDDSFNTFFSETGAGK               | 139 | 1.6   | 1.95   |     |       |       |
|    |             |        | VGINYQPPTVPPGGDLAK                 | 88  | 1.5   | 0.52   |     |       |       |
| 15 | IP100219217 | 37526  | L-lactate dehydrogenase B chain    | 26  | 152.0 | 0.00   | 332 | 113.6 | 56.01 |
|    |             |        | LIAPVAEEEEATVPNNK                  | 100 | 49.9  | 8.82   |     |       |       |
|    |             |        | MVVESAYEVIK                        | 70  | 155.0 | 11.99  |     |       |       |
|    |             |        | VIGSGCNLDSAR                       | 67  | 135.8 | 13.64  |     |       |       |
| 16 | IP100337544 | 131716 | phosphodiesterase 4D interacting   | 90  | 3.3   | 23.59  | 479 | 2.5   | 1.33  |
|    |             |        | DLQMQLVDPEDIPAMER                  | 77  | 0.2   | 5.35   |     |       |       |
|    |             |        | QCQVFVEAAAHESEQQK                  | 59  | 3.6   | 2.74   |     |       |       |
|    |             |        | QVLEHEMEIQGLLSVSTR                 | 60  | 2.6   | 2.73   |     |       |       |
|    |             |        | VADSDYEAIK                         | 38  | 2.6   | 1.93   |     |       |       |
| 17 | IP100301277 | 72188  | Heat shock 70 kDa protein 1L       | 73  | 0.9   | 0.52   | 349 | 0.8   | 0.36  |
|    |             |        | DAGVIAGLNVL                        | 80  | 1.2   | 1.22   |     |       |       |
|    |             |        | IINEPTAAAIYGLDK                    | 64  | 0.2   | 0.77   |     |       |       |
|    |             |        | TTPSYVAFTDTER                      | 49  | 0.9   | 1.39   |     |       |       |
|    |             |        | VEIANDQGNR                         | 53  | 0.9   | 0.77   |     |       |       |
| 18 | IP100026781 | 278233 | Fatty acid synthase                | 76  | 1.0   | 0.67   | 333 | 0.9   | 0.25  |
|    |             |        | ACLDTAVENMPSLK                     | 78  | 1.3   | 0.54   |     |       |       |
|    |             |        | LQVVDQPLPVR                        | 45  | 1.0   | 0.68   |     |       |       |
|    |             |        | SEGVAVLLTK                         | 38  | 0.6   | 2.53   |     |       |       |
|    |             |        | VVVQVLAEEPEAVLK                    | 96  | 0.8   | 0.52   |     |       |       |
| 19 | IP100339269 | 72562  | Heat shock 70 kDa protein 6        | 73  | 0.9   | 0.52   | 340 | 1.0   | 0.16  |
|    |             |        | IINEPTAAAIYGLDR                    | 107 | 1.3   | 1.65   |     |       |       |
|    |             |        | TTPSYVAFTDTER                      | 49  | 0.9   | 1.39   |     |       |       |
|    |             |        | VEIANDQGNR                         | 53  | 0.9   | 0.77   |     |       |       |
| 20 | IP100294398 | 35210  | Isoform 1 of Short chain 3-hydroxy | 68  | 0.2   | 0.33   | 135 | 0.2   | 0.00  |
|    |             |        | TFESLVDFSK                         | 67  | 0.3   | 0.00   |     |       |       |
| 21 | IP100007752 | 50704  | Tubulin beta-2C chain              | 127 | 1.4   | 1.55   | 358 | 1.6   | 0.19  |
|    |             |        | FWEVISDEHGIDPTGTYHGSDQLER          | 36  | 1.8   | 1.52   |     |       |       |
|    |             |        | ISEQFTAMFR                         | 31  | 1.5   | 3.08   |     |       |       |
|    |             |        | LAVNMVPPFR                         | 66  | 1.6   | 0.95   |     |       |       |
|    |             |        | NSSYFVEWIPNNVK                     | 58  | 1.8   | 1.07   |     |       |       |
|    |             |        | TAVCDIPPR                          | 40  | 1.4   | 0.66   |     |       |       |
| 22 | IP100024317 | 49086  | Isoform Long of Glutaryl-CoA dehy  | 46  | 4.2   | 0.00   | 247 | 4.2   | 0.02  |
|    |             |        | GELGCFGLTEPNSGSDPSSMETR            | 116 | 3.9   | 0.00   |     |       |       |
|    |             |        | HAMNLEAVNTYEGTHDIHALILGR           | 85  | 4.1   | 2.50   |     |       |       |
| 23 | IP100013296 | 18184  | 40S ribosomal protein S18          | 72  | 0.4   | 0.24   | 122 | 0.4   | 0.00  |
|    |             |        | IATAITAIK                          | 50  | 0.2   | 0.00   |     |       |       |
| 24 | IP100219018 | 36827  | GAPDH                              | 73  | 10.4  | 7.43   | 323 | 10.6  | 0.27  |
|    |             |        | IISNASCTTNCLAPLAK                  | 108 | 10.8  | 15.15  |     |       |       |
| 25 | IP100217966 | 37763  | lactate dehydrogenase A            | 31  | 223.9 | 110.23 | 179 | 194.9 | 52.29 |
|    |             |        | VIGSGCNLDSAR                       | 67  | 134.5 | 139.11 |     |       |       |
|    |             |        | VTLTSEEAR                          | 44  | 226.2 | 335.73 |     |       |       |
| 26 | IP100444262 | 67914  | CDNA FLJ45706 fis, clone FEBRA     | 75  | 0.5   | 0.00   | 171 | 0.4   | 0.04  |
|    |             |        | GFGFVDFNSEEDAK                     | 71  | 0.4   | 7.37   |     |       |       |
|    |             |        | NDLAVVDVR                          | 25  | 0.4   | 0.35   |     |       |       |
| 27 | IP100292496 | 50678  | Beta-tubulin 4Q                    | 127 | 1.4   | 1.55   | 233 | 1.5   | 0.13  |
|    |             |        | LAVNMVPPFR                         | 66  | 1.6   | 0.96   |     |       |       |
|    |             |        | TAVCDIPPR                          | 40  | 1.4   | 0.66   |     |       |       |
| 28 | IP100021439 | 42612  | Actin, cytoplasmic 1               | 98  | 1.9   | 1.07   | 220 | 1.1   | 0.96  |
|    |             |        | EITALAPSTMK                        | 35  | 0.0   | 0.52   |     |       |       |
|    |             |        | SYELPDGQVITIGNER                   | 97  | 1.4   | 0.42   |     |       |       |
| 29 | IP100003865 | 72624  | Isoform 1 of Heat shock cognate 7  | 34  | 1.6   | 20.49  | 245 | 0.9   | 0.58  |
|    |             |        | IINEPTAAAIYGLDK                    | 64  | 0.2   | 0.82   |     |       |       |
|    |             |        | TTPSYVAFTDTER                      | 49  | 0.9   | 1.39   |     |       |       |
|    |             |        | VEIANDQGNR                         | 53  | 0.9   | 0.77   |     |       |       |
| 30 | IP100290770 | 62032  | chaperonin containing TCP1, subu   | 59  | 0.7   | 0.39   | 128 | 0.7   | 0.39  |
|    |             |        | IIVLLDSSLEYK                       | 59  | 0.7   | 0.39   |     |       |       |
|    |             |        | TAVETAVLLLR                        | 69  | 0.7   | 0.00   |     |       |       |
| 31 | IP100302925 | 61488  | T-complex protein 1 subunit theta  | 69  | 1.3   | 0.00   | 117 | 1.3   | 0.00  |
|    |             |        | IIVYSCPFDMITETK                    | 48  | 1.3   | 0.85   |     |       |       |
| 32 | IP100018140 | 71105  | Isoform 1 of Heterogeneous nucle   | 34  | 1.0   | 0.36   | 160 | 1.3   | 0.32  |
|    |             |        | LMMDPLTGLNR                        | 48  | 1.6   | 0.75   |     |       |       |
|    |             |        | NLANTVTEEILEK                      | 47  | 1.2   | 0.63   |     |       |       |
| 33 | IP100470610 | 34947  | Pyroline-5-carboxylate reductase   | 45  | 0.1   | 0.78   | 119 | 1.5   | 1.90  |
|    |             |        | SLLINAVEASCIR                      | 74  | 2.8   | 0.31   |     |       |       |
| 34 | IP100329038 | 221070 | Isoform 1 of CDK5 regulatory subu  | 54  | 2.3   | 0.00   | 120 | 2.4   | 0.93  |
|    |             |        | EQNLNMQLFSEIHNLQNK                 | 54  | 2.3   | 0.00   |     |       |       |
|    |             |        | TLEEQISEIR                         | 66  | 2.4   | 0.93   |     |       |       |
| 35 | IP100093057 | 51563  | Coproporphyrinogen III oxidase, m  | 53  | 0.3   | 0.15   | 131 | 0.9   | 0.82  |
|    |             |        | AVVPSYIPLVK                        | 53  | 0.3   | 0.15   |     |       |       |
|    |             |        | CSSFMAPPVTDLGELR                   | 30  | 0.0   | 0.00   |     |       |       |
|    |             |        | EAEILEVLR                          | 58  | 1.4   | 0.00   |     |       |       |

|    |             |        |                                   |                    |    |       |       |     |       |        |
|----|-------------|--------|-----------------------------------|--------------------|----|-------|-------|-----|-------|--------|
| 36 | IPI00383046 | 28933  | Carboxymethylenebutenolidase ho   | DVSLLTQK           | 58 | 117.8 | 12.18 | 88  | 117.8 | 227.18 |
|    |             |        |                                   | VEYQIK             | 30 | 120.0 | 0.00  |     |       |        |
| 37 | IPI00075248 | 16948  | Calmodulin                        | DGNGYISAAELR       | 55 | 2.6   | 1.25  | 109 | 2.3   | 0.42   |
|    |             |        |                                   | EAFSLFDK           | 34 | 2.0   | 1.21  |     |       |        |
| 38 | IPI00011253 | 27431  | 40S ribosomal protein S3          | FGFPEGSVELYAEK     | 59 | 0.1   | 0.00  | 88  | 0.2   | 0.18   |
|    |             |        |                                   | QGVLGK             | 39 | 0.4   | 0.17  |     |       |        |
| 39 | IPI00025054 | 93023  | Isoform Long of Heterogeneous nu  | MCLFAGFQR          | 36 | 1.2   | 0.00  | 65  | 1.3   | 1.35   |
|    |             |        |                                   | SSGPTSLFAVTVAPPGAR | 39 | 1.3   | 1.35  |     |       |        |
| 40 | IPI00003918 | 49447  | 60S ribosomal protein L4          | AAAAAALQAK         | 57 | 1.4   | 0.80  | 78  | 1.4   | 0.80   |
|    |             |        |                                   | APIRPDIVNFVHTNLR   | 31 | 1.0   | 0.00  |     |       |        |
| 41 | IPI00297779 | 58728  | T-complex protein 1 subunit beta  | EALLSSAVDHGSDEVK   | 44 | 0.9   | 0.36  | 73  | 0.9   | 0.05   |
|    |             |        |                                   | ILIAN TGMDTDK      | 30 | 0.9   | 0.82  |     |       |        |
| 42 | IPI00017596 | 30665  | Microtubule-associated protein RP | LEHEYIQNFK         | 35 | 2.1   | 0.00  | 84  | 2.5   | 0.00   |
|    |             |        |                                   | LTVEDLEK           | 39 | 2.5   | 1.47  |     |       |        |
| 43 | IPI00013485 | 32290  | 40S ribosomal protein S2          | ATFDAISK           | 32 | 0.3   | 0.00  | 58  | 0.4   | 0.20   |
|    |             |        |                                   | LLMMAGIDDCYTSAR    | 35 | 0.4   | 0.20  |     |       |        |
| 44 | IPI00302592 | 287094 | Filamin A, alpha                  | AEAGVPAEFSIWTR     | 34 | 0.6   | 1.52  | 47  | 2.8   | 3.17   |
|    |             |        |                                   | TFSVWYVPEVTGTHK    | 33 | 5.1   | 0.00  |     |       |        |

Supplemental Table S3 (B)

Hek293\_Binding specificity ratio\_C8\_O-CH<sub>3</sub>

|    | Accession   | MW     | Protein Name                  | Peptide Sequence        | Peptide Score | Peptide C8/C8-OCH3 ratio | StDev  | Protein Score | Protein C8/C8-OCH3 ratio | StDev |
|----|-------------|--------|-------------------------------|-------------------------|---------------|--------------------------|--------|---------------|--------------------------|-------|
| 1  | IPI00063234 | 43998  | PKA RI $\alpha$               | AATIVATSEGLWGLDR        | 142           | 7.60                     | 5.04   | 876           | 13.2                     | 6.34  |
|    |             |        |                               | APASVLPAAATPR           | 61            | 8.81                     | 4.04   |               |                          |       |
|    |             |        |                               | CLVMDVQAFER             | 66            | 10.58                    | 7.68   |               |                          |       |
|    |             |        |                               | DGGNQEVEIAR             | 75            | 9.26                     | 9.82   |               |                          |       |
|    |             |        |                               | DILLFK                  | 56            | 10.07                    | 17.76  |               |                          |       |
|    |             |        |                               | GSFGELALMYNTPR          | 112           | 7.63                     | 6.07   |               |                          |       |
|    |             |        |                               | GTYDILVTK               | 62            | 8.91                     | 8.93   |               |                          |       |
|    |             |        |                               | VSVCAETYNPDEEEEDTPR     | 102           | 11.61                    | 7.03   |               |                          |       |
| 2  | IPI00021831 | 43828  | PKA RI $\alpha$               | EYFER                   | 33            | 0.35                     | 0.00   | 447           | 0.8                      | 0.49  |
|    |             |        |                               | GAISAEVYTEEDAASYVR      | 147           | 0.62                     | 0.00   |               |                          |       |
|    |             |        |                               | HNIQALLK                | 35            | 0.34                     | 0.00   |               |                          |       |
|    |             |        |                               | LTVADALEPVQFEDGQK       | 126           | 0.39                     | 0.35   |               |                          |       |
|    |             |        |                               | MYEEFLSK                | 36            | 0.54                     | 0.00   |               |                          |       |
|    |             |        |                               | SENEEFVEVGR             | 51            | 0.81                     | 0.53   |               |                          |       |
|    |             |        |                               | VLGPCSDILK              | 39            | 0.38                     | 0.00   |               |                          |       |
| 3  | IPI00456775 | 47317  | PKA RI $\beta$                | ASVCAEAYNPDEEEEDDAESR   | 128           | 19.87                    | 9.43   | 543           | 19.8                     | 12.34 |
|    |             |        |                               | DILLFK                  | 36            | 10.07                    | 17.76  |               |                          |       |
|    |             |        |                               | GSFGELALMYNTPR          | 112           | 7.54                     | 6.11   |               |                          |       |
|    |             |        |                               | SEVEENGAVEIAR           | 79            | 22.20                    | 17.34  |               |                          |       |
|    |             |        |                               | SLEFSER                 | 38            | 17.13                    | 9.99   |               |                          |       |
|    |             |        |                               | VVDVIGTK                | 37            | 11.90                    | 8.38   |               |                          |       |
| 4  | IPI00554488 | 44043  | PKA RI $\beta$                | MYEEFLSK                | 36            | 0.54                     | 0.22   | 49            | 0.5                      | 0.21  |
| 5  | IPI00427586 | 78494  | PKG I $\alpha$ / PKGI $\beta$ | AQGISAEPQTYR            | 75            | 103.52                   | 38.70  | 392           | 90.1                     | 11.61 |
|    |             |        |                               | GDTFFIISK               | 68            | 83.31                    | 51.96  |               |                          |       |
|    |             |        |                               | GIDMIEFPK               | 55            | 83.52                    | 113.58 |               |                          |       |
|    |             |        |                               | TLVNVK                  | 30            | 101.00                   | 0.00   |               |                          |       |
| 6  | IPI00022585 | 99512  | AKAP1                         | ETGGAEGTGDAVLGEK        | 56            | 1.20                     | 0.00   | 121           | 1.2                      | 0.00  |
| 7  | IPI00032064 | 124528 | AKAP2                         | SPGALETPSAAGSQGNTASQGK  | 38            | 1.18                     | 0.00   | 186           | 1.5                      | 0.46  |
|    |             |        |                               | STASLLATQESDVMVGPFK     | 115           | 1.83                     | 5.47   |               |                          |       |
| 8  | IPI00307794 | 48543  | AKAP5                         | DGDEVCESNVNSITSGEK      | 104           | 3.60                     | 0.00   | 135           | 3.5                      | 0.00  |
|    |             |        |                               | IIEDSDCSIK              | 31            | 3.49                     | 0.00   |               |                          |       |
| 9  | IPI00422254 | 38160  | AKAP7                         | AVQQYLEETQNK            | 72            | 7.46                     | 1.05   | 211           | 13.8                     | 0.76  |
|    |             |        |                               | IDLCSMLK                | 30            | 4.98                     | 0.00   |               |                          |       |
|    |             |        |                               | ILQNAIQQDER             | 63            | 10.40                    | 0.93   |               |                          |       |
|    |             |        |                               | LAEGDHVNSLLEIAETANR     | 56            | 9.66                     | 1.12   |               |                          |       |
| 10 | IPI00019223 | 465228 | AKAP9                         | ACMFEPLPIK              | 39            | 11.72                    | 3.64   | 1695          | 10.0                     | 1.53  |
|    |             |        |                               | AEGVIDGYADEK            | 66            | 9.73                     | 1.56   |               |                          |       |
|    |             |        |                               | DLELTQCYK               | 46            | 11.64                    | 1.49   |               |                          |       |
|    |             |        |                               | DNLGIHYK                | 38            | 4.35                     | 2.62   |               |                          |       |
|    |             |        |                               | DSQFETDIVQR             | 67            | 3.17                     | 2.69   |               |                          |       |
|    |             |        |                               | EVEQLANHLK              | 54            | 8.90                     | 1.35   |               |                          |       |
|    |             |        |                               | LALEQQVETANEEMTFMK      | 109           | 7.63                     | 1.53   |               |                          |       |
|    |             |        |                               | LLGELQEQIVQK            | 68            | 10.49                    | 0.00   |               |                          |       |
|    |             |        |                               | LQQELANIGQK             | 51            | 8.60                     | 0.00   |               |                          |       |
|    |             |        |                               | LSDLSEQLK               | 50            | 4.82                     | 1.24   |               |                          |       |
|    |             |        |                               | QQCIQLNEEIEK            | 44            | 6.16                     | 1.59   |               |                          |       |
|    |             |        |                               | QQIDGLQNEMSQK           | 67            | 7.84                     | 1.97   |               |                          |       |
|    |             |        |                               | QSQMLEMQVELSSMK         | 90            | 4.88                     | 1.50   |               |                          |       |
|    |             |        |                               | QYQEQLLEEVAK            | 67            | 6.41                     | 3.24   |               |                          |       |
|    |             |        |                               | SGFAGTEIDPENEELMLNISSR  | 119           | 7.04                     | 2.60   |               |                          |       |
|    |             |        |                               | SIASQTDGTLK             | 50            | 6.00                     | 2.41   |               |                          |       |
|    |             |        |                               | SSIDNENLVSER            | 71            | 8.23                     | 2.77   |               |                          |       |
|    |             |        |                               | SVLLAAFR                | 50            | 5.24                     | 0.18   |               |                          |       |
|    |             |        |                               | SYSNITVNEDQIK           | 81            | 3.34                     | 1.37   |               |                          |       |
|    |             |        |                               | TTAAVEETIGR             | 34            | 7.81                     | 3.92   |               |                          |       |
|    |             |        |                               | VTQTELMR                | 33            | 7.43                     | 3.43   |               |                          |       |
| 11 | IPI00007411 | 217039 | AKAP11                        | ESLPVSGEESQLTPEK        | 97            | 13.75                    | 2.00   | 436           | 9.0                      | 0.70  |
|    |             |        |                               | NPCLNVQSQR              | 36            | 7.41                     | 2.87   |               |                          |       |
|    |             |        |                               | SGYEEDNECHVTPELPK       | 42            | 5.43                     | 0.80   |               |                          |       |
|    |             |        |                               | SISCEVLGSLVR            | 78            | 4.44                     | 0.60   |               |                          |       |
|    |             |        |                               | SLTDSCLFEK              | 60            | 10.39                    | 0.00   |               |                          |       |
|    |             |        |                               | SQCDAAASQTVTGHHELETHDLK | 31            | 9.72                     | 2.30   |               |                          |       |
| 12 | IPI00003842 | 199539 | MAP2                          | LINQPLPDLK              | 34            | 10.85                    | 2.10   | 106           | 10.9                     | 1.77  |
|    |             |        |                               | SAILVPSEK               | 50            | 9.62                     | 3.64   |               |                          |       |
|    |             |        |                               | TPGTPGTPSYPR            | 32            | 12.12                    | 3.84   |               |                          |       |
| 13 | IPI00217966 | 37763  | lactate dehydrogenase A       | GEMMDLQHGSFLR           | 78            | 32.50                    | 1.48   | 350           | 56.0                     | 22.52 |
|    |             |        |                               | LVIITAGAR               | 44            | 44.56                    | 2.55   |               |                          |       |
|    |             |        |                               | SADTLWGIQK              | 49            | 46.60                    | 10.89  |               |                          |       |
|    |             |        |                               | VIGSGCNLDSAR            | 81            | 89.92                    | 517.86 |               |                          |       |

|    |             |        |                            |                             |     |        |        |     |       |        |
|----|-------------|--------|----------------------------|-----------------------------|-----|--------|--------|-----|-------|--------|
|    |             |        |                            | VTLTSEEEAR                  | 70  | 66.30  | 131.51 |     |       |        |
| 14 | IPI00011654 | 50704  | Tubulin beta-2 chain       | AILVDLEPGTMDSVR             | 76  | 4.04   | 2.73   | 424 | 5.1   | 1.94   |
|    |             |        |                            | EVDEQMLNVQNK                | 100 | 5.71   | 3.64   |     |       |        |
|    |             |        |                            | ISEQFTAMFR                  | 31  | 7.77   | 5.19   |     |       |        |
|    |             |        |                            | ISVYYNEATGGK                | 33  | 5.42   | 7.81   |     |       |        |
|    |             |        |                            | LAVNMVFPFR                  | 50  | 2.59   | 2.80   |     |       |        |
|    |             |        |                            | YLTVAAVFR                   | 30  | 0.00   | 0.00   |     |       |        |
| 15 | IPI00166768 | 38214  | TUBA6 protein              | DVNAAIATIK                  | 40  | 2.05   | 3.79   | 185 | 3.3   | 1.72   |
|    |             |        |                            | TIGGGDDSFNTFFSETGAGK        | 145 | 4.48   | 1.62   |     |       |        |
| 16 | IPI00219217 | 37526  | L-lactate dehydrogenase    | GEMMDLQHGSFLQTPK            | 56  | 12.84  | 19.09  | 307 | 142.0 | 189.05 |
|    |             |        |                            | GLTSVINQK                   | 72  | 147.20 | 0.00   |     |       |        |
|    |             |        |                            | MVVESAYEVIK                 | 46  | 0.58   | 166.95 |     |       |        |
|    |             |        |                            | VIGSGCNLDSAR                | 81  | 407.55 | 530.63 |     |       |        |
| 17 | IPI00383046 | 28933  | Carboxymethylenebuteno     | DSEDIYNLK                   | 59  | 2.67   | 1.51   | 359 | 10.1  | 9.58   |
|    |             |        |                            | DVSLLTQK                    | 46  | 7.39   | 3.77   |     |       |        |
|    |             |        |                            | EISAILK                     | 38  | 3.48   | 12.30  |     |       |        |
|    |             |        |                            | EVQVEHIK                    | 52  | 10.85  | 17.34  |     |       |        |
|    |             |        |                            | LEYGGLGR                    | 37  | 26.22  | 7.45   |     |       |        |
| 18 | IPI00304925 | 71724  | Heat shock 70 kDa protei   | AQIHDLVLVGGSTR              | 55  | 0.46   | 0.00   | 211 | 3.5   | 2.67   |
|    |             |        |                            | ATAGDTHLGGEDFDNR            | 69  | 6.68   | 5.68   |     |       |        |
|    |             |        |                            | DNNLLGR                     | 40  | 2.36   | 3.10   |     |       |        |
|    |             |        |                            | QTQIFTTYSNDQPGVLIQVYEGER    | 64  | 4.39   | 3.08   |     |       |        |
| 19 | IPI00024317 | 49086  | Isoform Long of Glutaryl-C | GYGCAGVSSVAYGLLAR           | 83  | 27.67  | 176.30 | 289 | 55.6  | 39.54  |
|    |             |        |                            | HAMNLEAVNTYEGTHDIHALILGR    | 66  | 83.59  | 0.00   |     |       |        |
| 20 | IPI00018511 | 50678  | Tubulin beta-4q chain      | EAESCDCLQGFLTHSLGGGTGSGMGTL | 134 | 8.22   | 0.00   | 184 | 5.4   | 4.03   |
|    |             |        |                            | LAVNMVFPFR                  | 50  | 2.52   | 2.78   |     |       |        |
| 21 | IPI00219018 | 36827  | GAPDH                      | LISWYDNEFGYSNR              | 98  | 1.45   | 0.00   | 157 | 1.3   | 0.27   |
|    |             |        |                            | VIISAPSADAPMFVMGVNHEK       | 59  | 1.07   | 0.00   |     |       |        |
| 22 | IPI00026781 | 278233 | Fatty acid synthase        | LQVVDQPLPVR                 | 58  | 1.43   | 0.00   | 142 | 2.0   | 0.76   |
|    |             |        |                            | VVVQVLAEPEAVLK              | 84  | 2.51   | 1.37   |     |       |        |
| 23 | IPI00013296 | 18184  | 40S ribosomal protein S1   | IAFAITAIK                   | 58  | 1.23   | 0.61   | 94  | 1.2   | 0.04   |
|    |             |        |                            | VLNTNIDGR                   | 36  | 1.18   | 0.28   |     |       |        |
| 24 | IPI00337544 | 131716 | phosphodiesterase 4D int   | NSELQALR                    | 34  | 6.23   | 2.56   | 141 | 11.6  | 7.65   |
|    |             |        |                            | VADSDYEAIK                  | 57  | 17.05  | 11.51  |     |       |        |
| 25 | IPI00444262 | 67914  | CDNA FLJ45706 fis, clone   | FGYVDFESAEDLEK              | 57  | 1.20   | 0.00   | 113 | 0.8   | 0.50   |
|    |             |        |                            | GFGFVDFNSEEDAK              | 56  | 0.48   | 2.60   |     |       |        |
| 26 | IPI00018140 | 71105  | Isoform 1 of Heterogeneo   | LFVGSIPK                    | 39  | 0.46   | 0.00   | 119 | 0.4   | 0.04   |
|    |             |        |                            | NLANTVTEEILEK               | 42  | 0.40   | 1.94   |     |       |        |
| 27 | IPI00221354 | 53355  | Isoform Short of RNA-bind  | APKPDGPGGGPGGSHMGGNYGDDR    | 36  | 0.51   | 0.63   | 51  | 1.3   | 1.18   |
|    |             |        |                            | EFSGNPIK                    | 35  | 2.18   | 1.04   |     |       |        |
| 28 | IPI00022434 | 71576  | ALB protein                | LVTDLTK                     | 39  | 0.72   | 0.44   | 54  | 0.9   | 0.33   |
|    |             |        |                            | YICENQDSISSK                | 35  | 1.18   | 0.80   |     |       |        |
| 29 | IPI00093057 | 51563  | Coproporphyrinogen III ox  | EAEILEVLR                   | 32  | 1.17   | 0.00   | 54  | 0.8   | 0.47   |
|    |             |        |                            | YFEVEEADGNK                 | 36  | 0.51   | 0.23   |     |       |        |

Supplemental Table S3 (C)

Hek293\_Binding specificity ratio\_C8\_Control

|    | Accession   | MW     | Protein Name                    | Peptide Sequence         | Peptide Score | Peptide C8/Ctl ratio | StDev  | Protein Score | Protein C8/Ctl ratio | StDev  |
|----|-------------|--------|---------------------------------|--------------------------|---------------|----------------------|--------|---------------|----------------------|--------|
| 1  | IPI00063234 | 43998  | PKA RI $\alpha$                 | IVDVIGEK                 | 66            | 767.3                | 514.0  | 1016          | 169.9                | 229.08 |
|    |             |        |                                 | GSFGELALMYNTPR           | 133           | 197.7                | 243.2  |               |                      |        |
|    |             |        |                                 | MFESFIESVPLLK            | 79            | 113.1                | 151.3  |               |                      |        |
|    |             |        |                                 | AASAYAVGDVK              | 98            | 108.8                | 87.2   |               |                      |        |
|    |             |        |                                 | AATIVATSEGLWGLDR         | 74            | 70.0                 | 813.5  |               |                      |        |
|    |             |        |                                 | NISHYEEQLVK              | 47            | 64.9                 | 91.3   |               |                      |        |
|    |             |        |                                 | LLGPCMDIMK               | 49            | 63.5                 | 1144.9 |               |                      |        |
|    |             |        |                                 | CLVMDVQAFER              | 68            | 29.0                 | 13.3   |               |                      |        |
|    |             |        |                                 | NLDQEQLSQVLDAMFER        | 128           | 0                    | 0.0    |               |                      |        |
|    |             |        |                                 | QQPPDLVEFAVEYFTR         | 88            | 0                    | 0.0    |               |                      |        |
| 2  | IPI00021831 | 43828  | PKA RI $\alpha$                 | ECELYVQK                 | 37            | 97.4                 | 0.0    | 381           | 218.6                | 122.78 |
|    |             |        |                                 | GAISAEVYTEEDAASYVR       | 38            | 147.1                | 15.5   |               |                      |        |
|    |             |        |                                 | HNIQALLK                 | 147           | 256.2                | 55.1   |               |                      |        |
|    |             |        |                                 | ILMGSTLR                 | 50            | 373.6                | 149.9  |               |                      |        |
| 3  | IPI00456775 | 47317  | PKA RI $\beta$                  | CLAMDVQAFER              | 43            | 23.50                | 0.0    | 877           | 83.2                 | 85.75  |
|    |             |        |                                 | VVDVIGTK                 | 33            | 170.4                | 0.0    |               |                      |        |
|    |             |        |                                 | MYESFIESLPFLK            | 85            | 47.7                 | 0.0    |               |                      |        |
|    |             |        |                                 | NLDPEQMSQVLDAMFEK        | 98            | 60.4                 | 0.0    |               |                      |        |
|    |             |        |                                 | GTFDIYVK                 | 56            | 81.7                 | 0.0    |               |                      |        |
|    |             |        |                                 | DILLFK                   | 28            | 153.3                | 0.0    |               |                      |        |
|    |             |        |                                 | GSFGELALMYNTPR           | 133           | 237.7                | 116.4  |               |                      |        |
| 4  | IPI00554488 | 44043  | PKA RI $\beta$                  | ILMGSTLR                 | 38            | 147.1                | 15.5   | 119           | 78.0                 | 97.74  |
|    |             |        |                                 | SNSQSDSHDEEVSPTPNPVVK    | 58            | 8.8                  | 7.1    |               |                      |        |
| 5  | IPI00427586 | 78494  | PKG I $\alpha$ / PKGI $\beta$   | AQGISAEPQTYR             | 56            | 10.4                 | 4.2    | 545           | 60.0                 | 82.80  |
|    |             |        |                                 | CQSVLPVPSTHIGPR          | 57            | 13.5                 | 0.0    |               |                      |        |
|    |             |        |                                 | EAILDNDFMK               | 44            | 16.5                 | 0.0    |               |                      |        |
|    |             |        |                                 | GDTFFIISK                | 70            | 19.1                 | 7.9    |               |                      |        |
|    |             |        |                                 | GIDMIEFPK                | 71            | 80.1                 | 0.0    |               |                      |        |
|    |             |        |                                 | HLIGGLDDVSNK             | 58            | 220.3                | 0.0    |               |                      |        |
| 6  | IPI00171217 | 122975 | AKAP2                           | DALGDSLQVPVSPSSTTSSR     | 99            | 11.1                 | 21.6   | 289           | 10.2                 | 1.22   |
|    |             |        |                                 | STASLLATQESDVMVGPFK      | 37            | 9.3                  | 0.0    |               |                      |        |
| 7  | IPI00422254 | 38160  | AKAP7                           | AVQQYLEETQNK             | 75            | 7.1                  | 0.0    | 197           | 22.3                 | 21.50  |
|    |             |        |                                 | ILQNAIIQQDER             | 85            | 37.5                 | 15.1   |               |                      |        |
| 8  | IPI00019223 | 465228 | AKAP9                           | HQLDVIKAEK               | 87            | 50.9                 | 0.0    | 2632          | 138.7                | 49.65  |
|    |             |        |                                 | TLEDMLK                  | 71            | 9.32                 | 0.0    |               |                      |        |
|    |             |        |                                 | QQILTHQQLEEQDHLLLEDYQK   | 66            | 178.7                | 0.0    |               |                      |        |
|    |             |        |                                 | NSTHSSTAADLLQAK          | 64            | 32.6                 | 0.0    |               |                      |        |
|    |             |        |                                 | LIEMNGGGTGCNHELEMIR      | 62            | 101.1                | 8.7    |               |                      |        |
|    |             |        |                                 | FAQIIQEK                 | 60            | 143.8                | 0.0    |               |                      |        |
|    |             |        |                                 | ESDAMSTQDQHVLFGK         | 51            | 132.3                | 0.0    |               |                      |        |
|    |             |        |                                 | QLMGTVEELQK              | 35            | 100.4                | 0.2    |               |                      |        |
|    |             |        |                                 | LQGIMQEFQK               | 35            | 114.2                | 11.9   |               |                      |        |
|    |             |        |                                 | EVEIDQLNEQVTK            | 35            | 46.0                 | 14.8   |               |                      |        |
| 9  | IPI00007411 | 217039 | AKAP11                          | QEGGNSELIMDQYANR         | 122           | 4.1                  | 0.0    | 1163          | 74.1                 | 97.68  |
|    |             |        |                                 | SQCDAASQVTGHHLETHDLK     | 87            | 51.2                 | 3.1    |               |                      |        |
|    |             |        |                                 | TPPFHCDQAVLQCSEASSNK     | 63            | 25.1                 | 13.1   |               |                      |        |
|    |             |        |                                 | SISCEVLGSLR              | 92            | 34.6                 | 0.0    |               |                      |        |
|    |             |        |                                 | MFPVPSSQVK               | 25            | 54.5                 | 0.0    |               |                      |        |
|    |             |        |                                 | ESLPVSGEESQLTPEK         | 104           | 76.3                 | 0.0    |               |                      |        |
|    |             |        |                                 | EFMLLSK                  | 40            | 78.2                 | 0.0    |               |                      |        |
|    |             |        |                                 | VSMVHGSSLETLPSCPAVTGQK   | 60            | 132.2                | 0.0    |               |                      |        |
|    |             |        |                                 | SFSEDFVQSVMK             | 66            | 326.3                | 440.3  |               |                      |        |
| 10 | IPI00219018 | 36827  | GAPDH                           | GALQNIIPASTGAAK          | 72            | 15.3                 | 6.4    | 417           | 26.8                 | 7.78   |
|    |             |        |                                 | GILGYTEHQVSSDFNSDTHSSTFL | 72            | 29.2                 | 5.6    |               |                      |        |
|    |             |        |                                 | IISNASCTTNCLAPLAK        | 123           | 31.1                 | 7.5    |               |                      |        |
|    |             |        |                                 | LISWYDNEFGYSNR           | 92            | 31.8                 | 0.0    |               |                      |        |
| 11 | IPI00217966 | 37763  | lactate dehydrogenase A         | LLIVSNPVDILTYYAWK        | 31            | 14.2                 | 0.0    | 515           | 211.9                | 144.03 |
|    |             |        |                                 | LVIIITAGAR               | 52            | 150.1                | 0.0    |               |                      |        |
|    |             |        |                                 | NVNIFK                   | 64            | 184.6                | 72.3   |               |                      |        |
|    |             |        |                                 | QVVESAYEVIK              | 47            | 219.0                | 53.6   |               |                      |        |
|    |             |        |                                 | SADTLWGIQK               | 72            | 249.29               | 96.2   |               |                      |        |
| 12 | IPI00219217 | 37526  | L-lactate dehydrogenase B chain | GEMMDLQHGSFLQTPK         | 50            | 0.4                  | 0.0    | 427           | 92.2                 | 75.19  |
|    |             |        |                                 | GLTSVINQK                | 46            | 4.8                  | 1.7    |               |                      |        |
|    |             |        |                                 | IVVVTAGVR                | 107           | 98.1                 | 31.6   |               |                      |        |
|    |             |        |                                 | LIAPVAEEEEATVPNNK        | 72            | 119.6                | 57.0   |               |                      |        |
|    |             |        |                                 | MVVESAYEVIK              | 68            | 145.8                | 71.0   |               |                      |        |
|    |             |        |                                 | VIGSGCNLDSAR             | 64            | 184.6                | 72.3   |               |                      |        |
| 13 | IPI00011654 | 50544  | Tubulin beta-2 chain            | AILVDLEPGTMDSVR          | 90            | 1.9                  | 0.3    | 400           | 2.6                  | 1.33   |
|    |             |        |                                 | EIVHIQAGQCGNQIGAK        | 64            | 5.1                  | 2.4    |               |                      |        |

|    |             |        |                                                         |                           |     |       |      |     |       |        |
|----|-------------|--------|---------------------------------------------------------|---------------------------|-----|-------|------|-----|-------|--------|
|    |             |        |                                                         | EVDEQMLNVQNK              | 85  | 2.4   | 1.0  |     |       |        |
|    |             |        |                                                         | ISVYYNEATGGK              | 49  | 1.7   | 0.0  |     |       |        |
|    |             |        |                                                         | LAVNMVFPFR                | 64  | 3.1   | 2.0  |     |       |        |
|    |             |        |                                                         | YLTVAAVFR                 | 48  | 1.6   | 0.5  |     |       |        |
| 14 | IPI00383046 | 28933  | Carboxymethylenebutenolidase homolog                    | DSEDIYNLK                 | 75  | 96.6  | 27.6 | 313 | 335.2 | 351.53 |
|    |             |        |                                                         | DVSLLTQK                  | 49  | 841.6 | 0.0  |     |       |        |
|    |             |        |                                                         | TFSGQTHGFVHR              | 60  | 97.7  | 85.1 |     |       |        |
| 15 | IPI00304925 | 71724  | Heat shock 70 kDa protein 1                             | AFYPEEISSMVLTK            | 74  | 1.7   | 0.2  | 510 | 3.6   | 1.96   |
|    |             |        |                                                         | ATAGDTHLGGEDFDNR          | 51  | 3.3   | 1.0  |     |       |        |
|    |             |        |                                                         | FGDPVVQSDMK               | 60  | 2.1   | 0.6  |     |       |        |
|    |             |        |                                                         | NQVALNPQNTVFDK            | 44  | 3.7   | 0.3  |     |       |        |
|    |             |        |                                                         | QTQIFTTYSDNQPGVLIQVYEGER  | 69  | 2.2   | 1.1  |     |       |        |
|    |             |        |                                                         | TTPSYVAFTDTER             | 79  | 7.4   | 0.0  |     |       |        |
| 16 | IPI00301277 | 72188  | Heat shock 70 kDa protein 1L                            | AFYPEEISSMVLTK            | 74  | 1.7   | 0.2  | 490 | 3.1   | 2.50   |
|    |             |        |                                                         | ATAGDTHLGGEDFDNR          | 51  | 3.3   | 1.0  |     |       |        |
|    |             |        |                                                         | IINEPTAAAIAYGLDK          | 45  | 1.1   | 0.3  |     |       |        |
|    |             |        |                                                         | QTQIFTTYSDNQPGVLIQVYEGER  | 69  | 2.2   | 1.1  |     |       |        |
|    |             |        |                                                         | TTPSYVAFTDTER             | 79  | 7.4   | 0.0  |     |       |        |
| 17 | IPI00007752 | 50704  | Tubulin beta-2C chain                                   | EIVHLQAGQCQGNQIGAK        | 64  | 5.1   | 2.4  | 310 | 3.0   | 1.30   |
|    |             |        |                                                         | EVDEQMLNVQNK              | 85  | 2.4   | 1.0  |     |       |        |
|    |             |        |                                                         | INVYYNEATGGK              | 49  | 3.0   | 1.2  |     |       |        |
|    |             |        |                                                         | LAVNMVFPFR                | 64  | 3.1   | 2.0  |     |       |        |
|    |             |        |                                                         | YLTVAAVFR                 | 48  | 1.6   | 0.5  |     |       |        |
| 18 | IPI00018140 | 71105  | Isoform 1 of Heterogeneous nuclear ribonucleoprotein A1 | GFCFLEYEDHK               | 57  | 0.7   | 0.2  | 206 | 0.7   | 0.02   |
|    |             |        |                                                         | NLANTVTTEEILEK            | 66  | 0.6   | 0.4  |     |       |        |
| 19 | IPI00337544 | 131716 | phosphodiesterase 4D interacting protein 1              | DSLMSQAPISNQQAQAEVPTGCLGK | 41  | 36.0  | 0.0  | 345 | 58.3  | 31.60  |
|    |             |        |                                                         | QCQVFVEAAHSEEQK           | 64  | 80.7  | 0.0  |     |       |        |
| 20 | IPI00003865 | 72624  | Heat shock cognate 71 kDa protein                       | IINEPTAAAIAYGLDK          | 45  | 1.1   | 0.3  | 328 | 2.4   | 2.22   |
|    |             |        |                                                         | MVNHFAEFK                 | 30  | 2.2   | 0.9  |     |       |        |
|    |             |        |                                                         | NQVAMNPTNTVFDK            | 42  | 1.8   | 0.6  |     |       |        |
|    |             |        |                                                         | SFYPEEVSSMVLTK            | 42  | 1.3   | 0.0  |     |       |        |
|    |             |        |                                                         | SQIHDIIVLGGSTR            | 49  | 1.9   | 0.3  |     |       |        |
|    |             |        |                                                         | STAGDTHLGGEDFDNR          | 41  | 1.2   | 0.5  |     |       |        |
|    |             |        |                                                         | TTPSYVAFTDTER             | 79  | 7.4   | 0.0  |     |       |        |
| 21 | IPI00444262 | 67914  | CDNA FLJ45706 fis, clone FEBRA202845                    | FGYVDFESAEDLEK            | 90  | 0.5   | 0.2  | 207 | 0.5   | 0.14   |
|    |             |        |                                                         | GFGFVDFNSEEDAK            | 72  | 0.5   | 0.1  |     |       |        |
|    |             |        |                                                         | NDLAVVDVR                 | 45  | 0.7   | 0.0  |     |       |        |
| 22 | IPI00456484 | 259126 | Phosphodiesterase 4D interacting protein 1              | DSLMSQAPISNQQAQAEVPTGCLGK | 41  | 36.0  | 0.0  | 325 | 58.3  | 31.60  |
|    |             |        |                                                         | QCQVFVEAAHSEEQK           | 64  | 80.7  | 0.0  |     |       |        |
| 23 | IPI00012074 | 72446  | Heterogeneous nuclear ribonucleoprotein A1              | GFCFLEYEDHK               | 57  | 0.7   | 0.2  | 174 | 0.7   | 0.01   |
|    |             |        |                                                         | YGGPPDSVYSGVQPGIGTEVFG    | 34  | 0.7   | 0.2  |     |       |        |
| 24 | IPI00166738 | 41102  | Zinc-binding alcohol dehydrogenase domain 1             | FVGVNASDINYSAGR           | 81  | 13.5  | 0.0  | 217 | 7.3   | 8.81   |
|    |             |        |                                                         | SASVQGGFFLNHYLSK          | 64  | 1.0   | 0.3  |     |       |        |
| 25 | IPI00215719 | 22165  | 60S ribosomal protein L18                               | ILTFDQLALDSPK             | 85  | 0.9   | 0.3  | 149 | 1.5   | 0.78   |
|    |             |        |                                                         | TAVVVGITDDVR              | 64  | 2.0   | 0.7  |     |       |        |
| 26 | IPI00472102 | 62859  | Heat shock protein 60                                   | LVQDVANNTNEEAGDGTATVLA    | 134 | 0.3   | 0.1  | 192 | 0.2   | 0.05   |
|    |             |        |                                                         | NAGVEGSLIVEK              | 58  | 0.2   | 0.1  |     |       |        |
| 27 | IPI00093057 | 51563  | Coproporphyrinogen III oxidase, mitochondrial           | AGVSISVVHGNLSEEAQK        | 71  | 15.7  | 0.0  | 214 | 10.7  | 7.01   |
|    |             |        |                                                         | CSSFMAPPVTDLGLR           | 79  | 5.8   | 1.9  |     |       |        |
| 28 | IPI00013296 | 18184  | 40S ribosomal protein S18                               | IAFAITAQK                 | 63  | 0.3   | 0.1  | 182 | 0.5   | 0.24   |
|    |             |        |                                                         | VITIMQNPR                 | 60  | 0.8   | 0.1  |     |       |        |
|    |             |        |                                                         | YSQVLANGLDNK              | 59  | 0.5   | 0.1  |     |       |        |
| 29 | IPI00297779 | 58728  | T-complex protein 1 subunit beta                        | EALLSSAVDHGSDVEK          | 62  | 0.8   | 0.3  | 105 | 1.2   | 0.53   |
|    |             |        |                                                         | GATQQILDEAER              | 43  | 1.5   | 0.3  |     |       |        |
| 30 | IPI00645907 | 278288 | fatty acid synthase                                     | FCFTPHTEEGCLSER           | 41  | 1.9   | 0.9  | 169 | 2.0   | 0.83   |
|    |             |        |                                                         | GLVQALQTK                 | 51  | 1.3   | 0.5  |     |       |        |
| 31 | IPI00290770 | 62032  | chaperonin containing TCP1, subunit 3 isoform 1         | IVLLDSSLEYK               | 57  | 1.6   | 0.4  | 188 | 1.1   | 0.42   |
|    |             |        |                                                         | TAVETAALLR                | 43  | 1.3   | 0.4  |     |       |        |
| 32 | IPI00302592 | 287094 | Filamin A, alpha                                        | AEAGVPAEFSIWTR            | 48  | 1.7   | 1.1  | 161 | 2.2   | 0.47   |
|    |             |        |                                                         | AYGPGIEPTGNMVK            | 61  | 2.7   | 0.0  |     |       |        |
| 33 | IPI00302925 | 61488  | T-complex protein 1 subunit theta                       | HFSGLEEAVYR               | 47  | 0.9   | 0.6  | 104 | 1.2   | 0.34   |
|    |             |        |                                                         | IAVYSCFPDGMITETK          | 36  | 1.6   | 0.3  |     |       |        |
| 34 | IPI00396485 | 51797  | Elongation factor 1-alpha 1                             | QLIVGVNKK                 | 30  | 0.4   | 0.0  | 74  | 0.4   | 0.03   |
|    |             |        |                                                         | SGDAAIVDMVPGKPMCVESFSDYF  | 44  | 0.3   | 0.1  |     |       |        |

Supplementary Table S3 (D)

Rat Lung Tissue\_Binding specificity ratio\_C8\_C2

|    | Accession   | MW     | Protein Name                           | Peptide Sequence            | Peptide Score | Peptide C8/C2 ratio | StDev | Protein Score | Protein C8/C2 ratio | StDev |
|----|-------------|--------|----------------------------------------|-----------------------------|---------------|---------------------|-------|---------------|---------------------|-------|
| 1  | IPI00196684 | 46367  | PKA RI $\alpha$                        | AATIVATSDGSLWGLDR           | 95            | 2.3                 | 9.49  | 912           | 1.7                 | 0.98  |
|    |             |        |                                        | CLVMDVQAFER                 | 62            | 1.2                 | 0.33  |               |                     |       |
|    |             |        |                                        | GQYFGELALVTNKPR             | 112           | 0.1                 | 0.05  |               |                     |       |
|    |             |        |                                        | GSFGELALMYNTPR              | 67            | 1.1                 | 1.27  |               |                     |       |
|    |             |        |                                        | GTYDILVTK                   | 72            | 1.9                 | 1.32  |               |                     |       |
|    |             |        |                                        | LLGPCMDIMK                  | 61            | 3.9                 | 3.75  |               |                     |       |
|    |             |        |                                        | MFESFIESVPLFK               | 105           | 1.7                 | 1.27  |               |                     |       |
|    |             |        |                                        | NLDQEQLSQVLDAMFEK           | 128           | 1.7                 | 1.98  |               |                     |       |
|    |             |        |                                        | TDEHVIDQGGDDGNFYVIER        | 80            | 2.0                 | 0.95  |               |                     |       |
|    |             |        |                                        | VSVCAETFPNDEEEDNDPR         | 82            | 1.3                 | 0.50  |               |                     |       |
| 2  | IPI00231770 | 43782  | PKA RI $\alpha$                        | MYEEFLSK                    | 43            | 2.1                 | 2.51  | 121           | 1.6                 | 0.67  |
|    |             |        |                                        | VLGPCSDILK                  | 41            | 0.8                 | 0.22  |               |                     |       |
|    |             |        |                                        | VSILES LDK                  | 37            | 1.7                 | 1.36  |               |                     |       |
| 3  | IPI00365600 | 46979  | PKA RI $\beta$                         | CLAMDVQAFER                 | 68            | 2.2                 | 2.63  | 557           | 2.8                 | 1.33  |
|    |             |        |                                        | EGEHVIDQGGDDGNFYVIDR        | 86            | 4.6                 | 1.15  |               |                     |       |
|    |             |        |                                        | GSFGELALMYNTPR              | 67            | 1.1                 | 1.26  |               |                     |       |
|    |             |        |                                        | GTFDIYVK                    | 62            | 4.0                 | 2.67  |               |                     |       |
|    |             |        |                                        | LLGPCMEIMK                  | 60            | 2.9                 | 2.17  |               |                     |       |
|    |             |        |                                        | NLDPEQMSQVLDAMFEK           | 102           | 1.9                 | 1.21  |               |                     |       |
| 4  | IPI00766097 | 78639  | PKG I $\alpha$ / PKGI $\beta$          | EAILDNDFMK                  | 65            | 1.6                 | 29.36 | 715           | 1.6                 | 0.63  |
|    |             |        |                                        | EDSPSEDPVFLR                | 51            | 1.5                 | 0.32  |               |                     |       |
|    |             |        |                                        | GDTFFIISK                   | 63            | 1.1                 | 5.46  |               |                     |       |
|    |             |        |                                        | GIDMIEFPK                   | 60            | 2.6                 | 20.26 |               |                     |       |
|    |             |        |                                        | HTEYMEFLK                   | 66            | 1.4                 | 1.36  |               |                     |       |
|    |             |        |                                        | LADVLEETHYENGEYIIR          | 83            | 0.9                 | 0.53  |               |                     |       |
|    |             |        |                                        | LVDFGFAK                    | 49            | 1.1                 | 1.39  |               |                     |       |
|    |             |        |                                        | SVPTFQSLPDEILSK             | 91            | 1.4                 | 0.77  |               |                     |       |
|    |             |        |                                        | VELVQLK                     | 54            | 1.7                 | 1.06  |               |                     |       |
|    |             |        |                                        | VFGELAILYNCTR               | 92            | 2.8                 | 10.32 |               |                     |       |
| 5  | IPI00215470 | 77628  | AKAP5                                  | ATMGQAEAEATVGHIK            | 145           | 1.7                 | 1.40  | 613           | 1.9                 | 0.27  |
|    |             |        |                                        | ATVGQAEPIVQAEETVLR          | 140           | 1.7                 | 1.44  |               |                     |       |
|    |             |        |                                        | SGETALGQAEAEASSVSQADK       | 142           | 1.9                 | 0.60  |               |                     |       |
|    |             |        |                                        | SVLSQAEAEATVGHEEATVIQAQSQAK | 129           | 2.3                 | 0.73  |               |                     |       |
| 6  | IPI00393033 | 445055 | AKAP 9                                 | NAELIDLR                    | 39            | 3.6                 | 1.82  | 342           | 3.0                 | 1.87  |
|    |             |        |                                        | NFEVNYQELQR                 | 54            | 3.5                 | 9.36  |               |                     |       |
|    |             |        |                                        | SEEMNLQINELQK               | 101           | 4.7                 | 2.07  |               |                     |       |
|    |             |        |                                        | VAEVLSDIMSEK                | 68            | 0.4                 | 6.19  |               |                     |       |
|    |             |        |                                        | VVLSLMGDEAK                 | 61            | 0.702               | 0.03  | 60            | 1.42                | 0     |
| 8  | IPI00766036 | 216203 | AKAP11                                 | TSVTTTISEPWVQR              | 90            | 1.3                 | 0.54  | 90            | 1.3                 | 0.54  |
| 9  | IPI00421609 | 40631  | AKA7                                   | DYQPNYFLSIPITNK             | 63            | 1.9                 | 0.17  | 63            | 1.9                 | 0.17  |
| 10 | IPI00199076 | 107567 | PDE2A3                                 | AMLCVPVISR                  | 30            | 0.1                 | 2.37  | 330           | 0.2                 | 0.18  |
|    |             |        |                                        | LGGDFFTDEDER                | 57            | 0.2                 | 0.17  |               |                     |       |
|    |             |        |                                        | LLHDGIQPVAAIDSNFANFYTPR     | 61            | 0.4                 | 0.19  |               |                     |       |
|    |             |        |                                        | LLQDLFPK                    | 56            | 0.2                 | 0.18  |               |                     |       |
| 11 | IPI00196935 | 130730 | Rap guanine nucleotide exchange fact   | LGSGEGLIIVK                 | 29            | 25.0                | 12.03 | 88            | 18.1                | 9.78  |
|    |             |        |                                        | TFIDNLVNFKEK                | 59            | 11.2                | 31.51 |               |                     |       |
| 12 | IPI00368515 | 95593  | IRAG                                   | SSLGDAPSVAVSPNLSGSPASSR     | 157           | 0.6                 | 0.13  | 157           | 0.6                 | 0.13  |
| 13 | IPI00369586 | 240313 | myosin, heavy polypeptide 1 skeletal m | ALQEAHQQTLLDQLQAEEDK        | 61            | 0.3                 | 0.18  | 639           | 0.5                 | 0.17  |
|    |             |        |                                        | ANLLQAEIEELR                | 64            | 0.7                 | 0.36  |               |                     |       |
|    |             |        |                                        | DLEEATLQHEATAATLR           | 80            | 0.8                 | 0.28  |               |                     |       |
|    |             |        |                                        | HADSVAEELGEQIDNLQR          | 35            | 0.6                 | 0.21  |               |                     |       |
|    |             |        |                                        | IQLELNQVK                   | 30            | 0.6                 | 0.43  |               |                     |       |
|    |             |        |                                        | LASADIETYLLEK               | 57            | 0.3                 | 4.15  |               |                     |       |
|    |             |        |                                        | QAFTQQIEELK                 | 57            | 0.4                 | 0.29  |               |                     |       |
|    |             |        |                                        | VVESMQSTLDAEIR              | 40            | 0.5                 | 0.49  |               |                     |       |
| 14 | IPI00191090 | 42780  | Biglycan precursor                     | DLPETLNELHLHDHDK            | 59            | 0.4                 | 0.23  | 428           | 0.6                 | 0.14  |
|    |             |        |                                        | EISPDTTLLDLQNNDISELR        | 31            | 0.8                 | 0.25  |               |                     |       |
|    |             |        |                                        | IQAIELEDLLR                 | 66            | 0.5                 | 0.15  |               |                     |       |
|    |             |        |                                        | LAIQFGNYK                   | 52            | 0.5                 | 0.41  |               |                     |       |
|    |             |        |                                        | NHLVEIPPNLPSLVELR           | 52            | 0.7                 | 0.22  |               |                     |       |
|    |             |        |                                        | NMNCIEMGGNPLENSGFEPGAFDGLK  | 94            | 0.5                 | 0.24  |               |                     |       |
|    |             |        |                                        | VGINDFCMPMGFGVK             | 74            | 0.7                 | 0.25  |               |                     |       |
| 15 | IPI00199861 | 40907  | Decorin precursor                      | DLHTLILVNNK                 | 52            | 0.2                 | 1.14  | 275           | 0.1                 | 0.04  |
|    |             |        |                                        | MIVIELGGNPLK                | 77            | 0.1                 | 1.38  |               |                     |       |
|    |             |        |                                        | TSYTAVSLYSNPVR              | 91            | 0.1                 | 1.77  |               |                     |       |
|    |             |        |                                        | YWQIHPHTFR                  | 28            | 0.1                 | 0.34  |               |                     |       |
| 16 | IPI00231192 | 16320  | Hemoglobin beta-2 subunit              | FGDLSSASAIMGNPQVK           | 110           | 0.7                 | 0.38  | 255           | 0.8                 | 0.25  |
|    |             |        |                                        | LLVVYPWTQR                  | 41            | 0.6                 | 0.19  |               |                     |       |
|    |             |        |                                        | VINAFNDGLK                  | 40            | 0.8                 | 0.46  |               |                     |       |



|    |             |        |                                                               |                            |     |       |       |     |       |      |
|----|-------------|--------|---------------------------------------------------------------|----------------------------|-----|-------|-------|-----|-------|------|
|    |             |        |                                                               | VVAGVASALAHK               | 36  | 1.2   | 0.58  |     |       |      |
| 17 | IPI00557424 | 102069 | PREDICTED: similar to NS1-associate                           | LFVGSIPK                   | 32  | 0.8   | 0.23  | 174 | 0.9   | 0.20 |
|    |             |        |                                                               | SAFLCGVMK                  | 28  | 0.8   | 0.41  |     |       |      |
|    |             |        |                                                               | VTEGLTDVILYHQPDDK          | 53  | 0.8   | 0.65  |     |       |      |
|    |             |        |                                                               | YGGPPPDVSVYGGQQPSVGTIFVVK  | 23  | 1.2   | 1.28  |     |       |      |
| 18 | IPI00194562 | 72377  | Heterogeneous nuclear ribonucleoprotein                       | LFVGSIPK                   | 32  | 0.8   | 0.23  | 173 | 0.7   | 0.14 |
|    |             |        |                                                               | NLATTVTEEILEK              | 51  | 0.6   | 0.32  |     |       |      |
|    |             |        |                                                               | SAFLCGVMK                  | 28  | 0.8   | 0.41  |     |       |      |
|    |             |        |                                                               | VTEGLVDVILYHQPDDK          | 24  | 0.6   | 0.43  |     |       |      |
| 19 | IPI00230897 | 16317  | Hemoglobin beta-1 subunit                                     | LLVVPWTQR                  | 41  | 0.6   | 0.19  | 179 | 0.7   | 0.31 |
|    |             |        |                                                               | VINAFNDGLK                 | 40  | 0.8   | 0.46  |     |       |      |
|    |             |        |                                                               | VVAGVASALAHK               | 36  | 1.2   | 0.58  |     |       |      |
|    |             |        |                                                               | YFDSFGDLSASAIMGNPK         | 62  | 0.4   | 0.50  |     |       |      |
| 20 | IPI00400573 | 50674  | Tubulin, beta, 2                                              | ALTVPQLTQQMFDK             | 61  | 1.1   | 0.94  | 189 | 0.9   | 0.29 |
|    |             |        |                                                               | AVLVLEPGTMDSVR             | 65  | 0.6   | 0.57  |     |       |      |
|    |             |        |                                                               | NSSYFVEWIPNNVK             | 63  | 1.1   | 8.59  |     |       |      |
| 21 | IPI00362160 | 51319  | Tubulin beta-3 chain                                          | AILVDLEPGTMDSVR            | 42  | 8.6   | 21.42 | 166 | 3.8   | 4.15 |
|    |             |        |                                                               | ALTVPQLTQQMFDK             | 61  | 1.1   | 0.94  |     |       |      |
|    |             |        |                                                               | NSSYFVEWIPNNVK             | 63  | 1.9   | 23.43 |     |       |      |
| 22 | IPI00191745 | 50518  | Coproporphyrinogen oxidase                                    | AGVNISVVHGNLSEEAANQMR      | 51  | 0.1   | 0.09  | 163 | 0.2   | 0.06 |
|    |             |        |                                                               | CSTFMSSPVTCLR              | 58  | 0.3   | 0.44  |     |       |      |
|    |             |        |                                                               | TCAEAVVPSYVPIVK            | 54  | 0.2   | 0.10  |     |       |      |
| 23 | IPI00197579 | 50544  | Tubulin beta-5 chain                                          | AILVDLEPGTMDSVR            | 42  | 8.6   | 21.20 | 160 | 4.1   | 3.93 |
|    |             |        |                                                               | ALTVPQLTQQVFDK             | 55  | 1.7   | 18.52 |     |       |      |
|    |             |        |                                                               | NSSYFVEWIPNNVK             | 63  | 2.0   | 25.21 |     |       |      |
| 24 | IPI00205157 | 35409  | Short chain 3-hydroxyacyl-CoA dehydrogenase                   | FILDGWHEMDPENPLFQSPSPMNNLV | 28  | 0.9   | 3.70  | 133 | 2.7   | 1.68 |
|    |             |        |                                                               | LLVPYLIEAIR                | 44  | 3.1   | 0.00  |     |       |      |
|    |             |        |                                                               | TFESLVDFCK                 | 61  | 4.2   | 11.18 |     |       |      |
| 25 | IPI00212647 | 36813  | GAPDH                                                         | IVSNASCTTNCLAPLAK          | 123 | 3.1   | 1.25  | 198 | 3.3   | 0.31 |
|    |             |        |                                                               | LISWYDNEYGYSNR             | 75  | 3.6   | 3.35  |     |       |      |
| 26 | IPI00197711 | 37525  | L-lactate dehydrogenase A chain                               | GEMMDLQHGSLFLK             | 58  | NaN   | 0.00  | 133 | 134.0 | 0.00 |
|    |             |        |                                                               | SADTLWGIQK                 | 75  | 134.0 | 89.56 |     |       |      |
| 27 | IPI00360386 | 99413  | PREDICTED: similar to heterogeneous nuclear ribonucleoprotein | EVEGDDVPESIMLEMK           | 88  | 2.3   | 1.11  | 133 | 2.0   | 0.42 |
|    |             |        |                                                               | VVVVVPNEEDWK               | 45  | 1.7   | 0.75  |     |       |      |
| 28 | IPI00205036 | 15810  | Alpha-2-globin chain                                          | AADHVEDLPGALSTLSDLHAHK     | 45  | 0.3   | 2.20  | 104 | 0.4   | 0.16 |
|    |             |        |                                                               | MFAAFPPTTK                 | 59  | 0.6   | 0.50  |     |       |      |
| 29 | IPI00189819 | 42612  | Actin, cytoplasmic 1                                          | SYELPDGQVITIGNER           | 51  | NaN   | 0.00  | 96  | 0.8   | 0.00 |
|    |             |        |                                                               | VAPEEHPVLLTEAPLNPK         | 45  | 0.8   | 0.92  |     |       |      |
| 30 | IPI00327185 | 46695  | nucleosome assembly protein 1-like 1                          | NVDLLSDMVQEHDEPILK         | 40  | 0.4   | 0.00  | 88  | 0.3   | 0.19 |
|    |             |        |                                                               | YAVLYQPLFDK                | 48  | 0.1   | 1.03  |     |       |      |

Supplemental Table S3 (E)

Rat Lung Tissue\_Binding specificity ratio\_C8\_C8-OCH<sub>3</sub>

|    | Accession   | MW     | Protein Name                  | Peptide Sequence           | Peptide Score | Peptide C8/C8-OCH3 ratio | StDev  | Protein Score | Protein C8/C8-OCH3 ratio | StDev |
|----|-------------|--------|-------------------------------|----------------------------|---------------|--------------------------|--------|---------------|--------------------------|-------|
| 1  | IP100196684 | 46367  | PKA RI $\alpha$               | AATIVATSDGSLWGLDR          | 143           | 9.76                     | 3.46   | 1276          | 8.7                      | 3.91  |
|    |             |        |                               | CLVMDVQAFER                | 73            | 7.28                     | 4.51   |               |                          |       |
|    |             |        |                               | DILLFK                     | 28            | 8.97                     | 0.27   |               |                          |       |
|    |             |        |                               | GSFGELALMYNTPR             | 123           | 7.75                     | 4.20   |               |                          |       |
|    |             |        |                               | GTYDILVTK                  | 79            | 9.69                     | 1.13   |               |                          |       |
|    |             |        |                               | LLGPCMDIMK                 | 66            | 14.48                    | 6.55   |               |                          |       |
|    |             |        |                               | MFESFIESVPLFK              | 113           | 10.64                    | 11.66  |               |                          |       |
|    |             |        |                               | NISHYEEQLVK                | 59            | 12.86                    | 18.68  |               |                          |       |
|    |             |        |                               | NLDQEQLSQVLDAMFEK          | 130           | 6.78                     | 6.11   |               |                          |       |
|    |             |        |                               | QQPPDLVDFAVEYFTR           | 92            | 9.38                     | 2.96   |               |                          |       |
|    |             |        |                               | TDEHVIDQGGDDGNFYVIER       | 84            | 6.40                     | 10.35  |               |                          |       |
|    |             |        |                               | VSVCAETFNPDDEEDNDPR        | 83            | 10.54                    | 5.11   |               |                          |       |
| 2  | IP100231770 | 43782  | PKA RI $\alpha$               | HNIQALLK                   | 52            | 0.3                      | 0.19   | 395           | 0.2                      | 0.07  |
|    |             |        |                               | LTVADALEPVQFEDGQK          | 124           | 0.2                      | 0.15   |               |                          |       |
|    |             |        |                               | MYEEFLSK                   | 57            | 0.3                      | 0.28   |               |                          |       |
|    |             |        |                               | VLGPCSDILK                 | 61            | 0.4                      | 0.15   |               |                          |       |
|    |             |        |                               | VSILESLDK                  | 71            | 0.2                      | 0.08   |               |                          |       |
| 3  | IP100365600 | 46979  | PKA RI $\beta$                | AATITATSPGALWGLDR          | 119           | 16.8                     | 12.84  | 954           | 18.9                     | 9.37  |
|    |             |        |                               | CLAMDVQAFER                | 65            | 14.6                     | 6.99   |               |                          |       |
|    |             |        |                               | DILLFK                     | 28            | 16.0                     | 57.17  |               |                          |       |
|    |             |        |                               | EGEHVIDQGGDDGNFYVIDR       | 109           | 19.1                     | 17.98  |               |                          |       |
|    |             |        |                               | GSFGELALMYNTPR             | 123           | 17.7                     | 4.20   |               |                          |       |
|    |             |        |                               | GTFDIYVK                   | 59            | 18.9                     | 10.53  |               |                          |       |
|    |             |        |                               | HQPADLLEFALQHFTR           | 62            | 16.1                     | 8.07   |               |                          |       |
|    |             |        |                               | LLGPCMEIMK                 | 64            | 17.6                     | 29.45  |               |                          |       |
|    |             |        |                               | MYESFIESLPFLK              | 100           | 18.6                     | 15.24  |               |                          |       |
|    |             |        |                               | NLDPEQMSQVLDAMFEK          | 102           | 23.2                     | 15.67  |               |                          |       |
| 4  | IP100766097 | 78639  | PKG I $\alpha$ / PKGI $\beta$ | CQSVLPVPSTHIGPR            | 80            | 17.3                     | 13.59  | 880           | 101.1                    | 75.48 |
|    |             |        |                               | EAILDNDFMK                 | 45            | 18.8                     | 19.78  |               |                          |       |
|    |             |        |                               | GDTFFIISK                  | 75            | 175.7                    | 105.26 |               |                          |       |
|    |             |        |                               | HTEYMEFLK                  | 34            | 194.0                    | 319.86 |               |                          |       |
|    |             |        |                               | LADVLEETHYENGEYIIR         | 101           | 91.7                     | 112.66 |               |                          |       |
|    |             |        |                               | LVDFGFAK                   | 48            | 234.6                    | 136.73 |               |                          |       |
|    |             |        |                               | LWAIDR                     | 23            | 28.7                     | 68.21  |               |                          |       |
|    |             |        |                               | QCFQTIMMR                  | 46            | 119.2                    | 54.45  |               |                          |       |
|    |             |        |                               | QIMQGAHSDFIVR              | 64            | 45.1                     | 26.66  |               |                          |       |
|    |             |        |                               | SVPTFQSLPDEILSK            | 82            | 141.8                    | 137.44 |               |                          |       |
|    |             |        |                               | TYNIILR                    | 42            | 122.8                    | 67.19  |               |                          |       |
|    |             |        |                               | VFGELAILYNCTR              | 73            | 24.0                     | 58.11  |               |                          |       |
| 6  | IP100215470 | 77628  | AKAP 5                        | ATMGQAEATVGHIK             | 119           | 8.9                      | 7.35   | 810           | 11.0                     | 3.88  |
|    |             |        |                               | ATVGQAEPIVQAEETVLR         | 132           | 9.6                      | 1.30   |               |                          |       |
|    |             |        |                               | ETVLSQAEVVK                | 76            | 7.1                      | 2.67   |               |                          |       |
|    |             |        |                               | LSQIEEPAISQAK              | 82            | 7.1                      | 2.43   |               |                          |       |
|    |             |        |                               | SGETALGQAEASSVSQADK        | 149           | 8.1                      | 8.71   |               |                          |       |
|    |             |        |                               | SVLSQAEATVGHTTEATVIQAQSQAK | 118           | 9.7                      | 9.47   |               |                          |       |
|    |             |        |                               | TSEQYETLLIETASSLVK         | 134           | 9.9                      | 4.67   |               |                          |       |
| 7  | IP100421609 | 40631  | AKAP7                         | DYQPNYFLSIPITNK            | 36            | 13.8                     | 0.33   | 26            | 13.8                     | 0.33  |
|    |             |        |                               | METMQCETDNLITR             | 66            | 1.3                      | 3.44   |               |                          |       |
|    |             |        |                               | NFEVNYQELQR                | 47            | 7.0                      | 1.16   |               |                          |       |
|    |             |        |                               | SEEMNLQINELQK              | 76            | 5.2                      | 2.13   |               |                          |       |
| 8  | IP100766036 | 216203 | AKAP11                        | GVSSCTNALCHLAVK            | 101           | 6.4                      | 0.15   | 222           | 6.3                      | 0.10  |
|    |             |        |                               | TSVTTTSISEPWTQR            | 77            | 6.2                      | 0.09   |               |                          |       |
| 9  | IP100196935 | 130730 | 128 kDa protein (Epac2)       | TFIDNLVNFEK                | 44            | 3.4                      | 22.53  | 115           | 2.7                      | 0.91  |
|    |             |        |                               | VLLQQFNTGDER               | 71            | 2.1                      | 7.43   |               |                          |       |
| 10 | IP100213479 | 92660  | AKAP1                         | VVLSLMGDEAK                | 29            | 0.902                    | 0.03   | 60            | 1.11                     | 0     |
| 11 | IP100368515 | 95593  | IRAG                          | SSLGDAPSAVSPNLSSGASPASSR   | 90            | 4.5                      | 1.31   | 90            | 4.5                      | 1.30  |
| 12 | IP100189819 | 42612  | Actin, cytoplasmic 1          | EITALAPSTMK                | 57            | 1.0                      | 1.23   | 324           | 1.0                      | 0.56  |
|    |             |        |                               | SYELPDGQVITIGNER           | 97            | 1.6                      | 2.43   |               |                          |       |
|    |             |        |                               | VAPEEHPVLLTEAPLNPK         | 94            | 0.4                      | 50.48  |               |                          |       |
| 13 | IP100191090 | 42780  | Biglycan precursor            | DLPETLNELHLDHMK            | 65            | 0.5                      | 0.34   | 320           | 0.6                      | 0.30  |
|    |             |        |                               | GVFSGLR                    | 39            | 0.2                      | 0.47   |               |                          |       |
|    |             |        |                               | IQAIELEDLLR                | 67            | 0.6                      | 0.23   |               |                          |       |
|    |             |        |                               | LAIQFGNYK                  | 39            | 0.5                      | 0.33   |               |                          |       |
|    |             |        |                               | VGINDFCPMFGVVK             | 82            | 0.6                      | 0.24   |               |                          |       |
|    |             |        |                               | VPAGLPDLK                  | 28            | 1.1                      | 0.42   |               |                          |       |
| 14 | IP100189813 | 42927  | Actin, alpha skeletal muscle  | EITALAPSTMK                | 57            | 1.0                      | 1.23   | 282           | 1.3                      | 0.38  |
|    |             |        |                               | SYELPDGQVITIGNER           | 97            | 1.5                      | 2.42   |               |                          |       |
| 15 | IP100205036 | 15810  | Alpha-2-globin chain          | AADHVEDLPGALSTLSDLHAHK     | 95            | 1.1                      | 0.55   | 245           | 1.1                      | 0.19  |
|    |             |        |                               | FLASVSTVLTSK               | 22            | 0.8                      | 0.43   |               |                          |       |

|    |             |        |                                       |                      |     |       |        |     |       |       |
|----|-------------|--------|---------------------------------------|----------------------|-----|-------|--------|-----|-------|-------|
|    |             |        |                                       | MFAAFPPTK            | 58  | 1.2   | 0.71   |     |       |       |
|    |             |        |                                       | TYFSHIDVSPGSAQVK     | 70  | 1.1   | 0.74   |     |       |       |
| 16 | IPI00230897 | 16317  | Hemoglobin beta-1 subunit             | LHVDPENFR            | 22  | 0.3   | 0.13   | 320 | 0.6   | 0.35  |
|    |             |        |                                       | LLVVYPWTQR           | 42  | 0.8   | 0.52   |     |       |       |
|    |             |        |                                       | VINAFNDGLK           | 50  | 1.0   | 0.32   |     |       |       |
|    |             |        |                                       | VVAGVASALAHK         | 24  | 0.2   | 0.09   |     |       |       |
|    |             |        |                                       | YFDSFGDLSSASAIMGNPK  | 142 | 0.4   | 0.23   |     |       |       |
| 17 | IPI00369586 | 240313 | myosin, heavy polypeptide 1, skeletal | ALQEAHQQTLDLQAEEDK   | 108 | 0.6   | 0.22   | 177 | 1.7   | 0.94  |
|    |             |        |                                       | DLEEATLQHEATAATLR    | 87  | 2.6   | 0.00   |     |       |       |
|    |             |        |                                       | LASADIETYLLEK        | 53  | 1.4   | 3.98   |     |       |       |
|    |             |        |                                       | SELQAALKEEAASLEHEEGK | 44  | 2.4   | 2.19   |     |       |       |
| 18 | IPI00197711 | 37525  | L-lactate dehydrogenase A chain       | DLADELALVDVIEDK      | 57  | 99.6  | 155.95 | 213 | 131.5 | 53.69 |
|    |             |        |                                       | DQLIVNLLK            | 52  | 137.0 | 0.00   |     |       |       |
|    |             |        |                                       | FIIPNVVK             | 31  | 193.5 | 0.00   |     |       |       |
|    |             |        |                                       | SADTLWGIQK           | 73  | 101.4 | 208.05 |     |       |       |
| 19 | IPI00231192 | 16320  | Hemoglobin beta-2 subunit             | FGDLSSASAIMGNPQVK    | 47  | 1.1   | 0.69   | 225 | 0.7   | 0.42  |
|    |             |        |                                       | LHVDPENFR            | 22  | 0.3   | 0.13   |     |       |       |
|    |             |        |                                       | LLVVYPWTQR           | 42  | 0.8   | 0.52   |     |       |       |
|    |             |        |                                       | VINAFNDGLK           | 50  | 1.0   | 0.32   |     |       |       |
|    |             |        |                                       | VVAGVASALAHK         | 24  | 0.2   | 0.09   |     |       |       |
| 20 | IPI00212647 | 36813  | GAPDH                                 | IVSNASCTTNCCLAPLAK   | 95  | 4.3   | 2.68   | 176 | 4.7   | 0.60  |
|    |             |        |                                       | LISWYDNEYGYSNR       | 81  | 5.2   | 1.53   |     |       |       |
| 21 | IPI00201032 | 39264  | Isoform 1 of Heterogeneous nuclear    | GFGFVLFK             | 54  | 3.0   | 0.85   | 151 | 2.9   | 0.13  |
|    |             |        |                                       | IFVGGLSPTDPEEK       | 97  | 2.8   | 2.60   |     |       |       |
| 22 | IPI00199861 | 40907  | Decorin precursor                     | MIVIELGGNPLK         | 54  | 0.2   | 0.15   | 160 | 0.2   | 0.11  |
|    |             |        |                                       | TSYTAVSLYNSPVR       | 106 | 0.3   | 0.13   |     |       |       |
| 23 | IPI00372601 | 227048 | myosin heavy polypeptide 13           | DLEEATLQHEATAATLR    | 87  | 2.6   | 0.00   | 475 | 2.0   | 0.85  |
|    |             |        |                                       | LASADIETYLLEK        | 53  | 1.4   | 3.98   |     |       |       |
| 24 | IPI00189795 | 51348  | Tubulin alpha-1 chain                 | TIGGGDDSFNTFFSETGAGK | 37  | 1.7   | 0.47   | 100 | 1.7   | 0.00  |
|    |             |        |                                       | VGINYQPPTVVPGGDLAK   | 63  | 1.7   | 0.56   |     |       |       |
| 25 | IPI00190348 | 14470  | H2B histone family, member T          | AMGIMNSFVNDIFER      | 80  | 0.1   | 0.15   | 147 | 0.1   | 0.02  |
|    |             |        |                                       | LLLPGELAK            | 46  | 0.0   | 0.02   |     |       |       |

Supplemental Table S3 (F)

Rat Lung tissue\_Binding specificity ratio\_C8\_Control

|    | Accession   | MW     | Protein Name                            | Peptide Sequence           | Peptide Score | Peptide C8/Ctl ratio | StDev | Protein Score | Protein C8/Ctl ratio | StDev |
|----|-------------|--------|-----------------------------------------|----------------------------|---------------|----------------------|-------|---------------|----------------------|-------|
| 1  | IP100196684 | 46367  | PKA RI $\alpha$                         | AATIVATSDGSLWGLDR          | 157           | 296.5                | 118.8 | 1075          | 293.6                | 300.0 |
|    |             |        |                                         | CLVMDVQAFER                | 63            | 43.2                 | 9.8   |               |                      |       |
|    |             |        |                                         | GSFGELALMYNTPR             | 96            | 118.1                | 50.6  |               |                      |       |
|    |             |        |                                         | GTYDILVTK                  | 69            | 989.3                | 451.6 |               |                      |       |
|    |             |        |                                         | LLGPCMDIMK                 | 52            | 301.3                | 37.7  |               |                      |       |
|    |             |        |                                         | NISHYEEQLVK                | 63            | 331.8                | 170.9 |               |                      |       |
|    |             |        |                                         | NLDQEQLSQVLDAMFEK          | 142           | NaN                  | 0.0   |               |                      |       |
|    |             |        |                                         | QQPPDLVDFAVEYFTR           | 110           | 144.9                | 0.0   |               |                      |       |
|    |             |        |                                         | TDEHVIDQGGDDGNFYVIER       | 97            | 123.4                | 47.4  |               |                      |       |
|    |             |        |                                         | VSVCAETFNPDDEEDNDPR        | 114           | NaN                  | 0.0   |               |                      |       |
| 5  | IP100231770 | 43782  | PKA RI $\alpha$                         | GAISAEVYTEEDAASYVR         | 146           | 79.4                 | 43.9  | 252           | 103.8                | 94.5  |
|    |             |        |                                         | MYEEFLSK                   | 47            | 94.5                 | 18.0  |               |                      |       |
|    |             |        |                                         | VLGPCSDILK                 | 33            | 7.6                  | 14.8  |               |                      |       |
| 3  | IP100365600 | 46979  | PKA RI $\beta$                          | CLAMDVQAFER                | 61            | 13.5                 | 23.2  | 558           | 99.1                 | 88.4  |
|    |             |        |                                         | EGEHVIDQGGDDGNFYVIDR       | 113           | 71.8                 | 38.6  |               |                      |       |
|    |             |        |                                         | GSFGELALMYNTPR             | 96            | 104.0                | 61.1  |               |                      |       |
|    |             |        |                                         | GTFDIYVK                   | 45            | 246.2                | 0.0   |               |                      |       |
|    |             |        |                                         | LLGPCMEIMK                 | 39            | 60.0                 | 27.9  |               |                      |       |
|    |             |        |                                         | NLDPEQMSQVLDAMFEK          | 92            | 0.0                  | 0.0   |               |                      |       |
| 4  | IP100766097 | 78639  | PKG I $\alpha$ / PKGI $\beta$           | EAILDNDFMK                 | 61            | 450.5                | 600.2 | 446           | 188.5                | 130.1 |
|    |             |        |                                         | GIDMIEFPK                  | 69            | 52.8                 | 49.5  |               |                      |       |
|    |             |        |                                         | LADVLEETHYENGEYIIR         | 93            | 0.0                  | 0.0   |               |                      |       |
|    |             |        |                                         | LVDFGFAK                   | 25            | 110.6                | 812.4 |               |                      |       |
|    |             |        |                                         | LWAIDR                     | 25            | 139.0                | 47.5  |               |                      |       |
|    |             |        |                                         | QCFQTIMMR                  | 46            | 159.3                | 77.2  |               |                      |       |
|    |             |        |                                         | TYNIILR                    | 43            | 155.0                | 70.8  |               |                      |       |
|    |             |        |                                         | VELVQLK                    | 48            | 251.9                | 0.0   |               |                      |       |
| 2  | IP100215470 | 77628  | AKAP5                                   | ATMGQAEEATVGHIEK           | 122           | 118.7                | 203.5 | 647           | 89.9                 | 102.0 |
|    |             |        |                                         | ATVGQAEEPIVGQAETVLR        | 125           | 221.6                | 142.4 |               |                      |       |
|    |             |        |                                         | ETVLSQAEEVK                | 79            | NaN                  | 0.0   |               |                      |       |
|    |             |        |                                         | LSQIEEPAISQAK              | 68            | NaN                  | 0.0   |               |                      |       |
|    |             |        |                                         | SGETALGQAEEASSVSQADK       | 125           | 2.1                  | 55.2  |               |                      |       |
|    |             |        |                                         | SVLSQAEEATVGHTEEATVIQAQSQA | 128           | 17.1                 | 21.1  |               |                      |       |
| 6  | IP100393033 | 445055 | AKAP9                                   | NFEVNYQELQR                | 52            | 180.0                | 83.3  | 99            | 140.4                | 83.3  |
|    |             |        |                                         | QLQEFEEAIK                 | 47            | 100.7                | 0.0   |               |                      |       |
| 7  | IP100210194 | 128384 | AKAP11                                  | SCQPLQNHGLCQNTSSLSGYSCGES  | 67            | 124.7                | 0     | 67            | 124.7                | 0     |
| 8  | IP100196935 | 130730 | 128 kDa protein (Epac2)                 | LGSGEGLIVK                 | 37            | 108.3                | 0     | 37            | 108.3                | 0     |
| 9  | IP100231192 | 16320  | Hemoglobin beta-2 subunit               | ATVSGLWVK                  | 51            | 0.2                  | 0.1   | 361           | 0.1                  | 0.1   |
|    |             |        |                                         | FGDLSSASAIMGNPQVK          | 77            | 0.3                  | 0.7   |               |                      |       |
|    |             |        |                                         | GTF AHLSELHCDK             | 82            | 0.0                  | 0.1   |               |                      |       |
|    |             |        |                                         | LHVDPENFR                  | 45            | 0.1                  | 0.1   |               |                      |       |
|    |             |        |                                         | VVAGVASALAHK               | 106           | 0.0                  | 0.0   |               |                      |       |
| 10 | IP100230897 | 16317  | Hemoglobin beta-1 subunit               | GTF AHLSELHCDK             | 82            | 0.0                  | 0.1   | 301           | 0.1                  | 0.2   |
|    |             |        |                                         | LHVDPENFR                  | 45            | 0.1                  | 0.1   |               |                      |       |
|    |             |        |                                         | VVAGVASALAHK               | 106           | 0.0                  | 0.0   |               |                      |       |
|    |             |        |                                         | YFDSFGDLSSASAIMGNPK        | 68            | 0.4                  | 0.2   |               |                      |       |
| 11 | IP100205036 | 15810  | Alpha-2-globin chain                    | AADHVEDLPGALSTLSDLHAHK     | 99            | 0.2                  | 0.1   | 226           | 0.2                  | 0.0   |
|    |             |        |                                         | FLASVSTVLTSK               | 66            | 0.2                  | 0.2   |               |                      |       |
|    |             |        |                                         | MFAAFPSTTK                 | 61            | 0.2                  | 0.1   |               |                      |       |
| 12 | IP100369586 | 240313 | myosin, heavy polypeptide 1, skeletal m | DLEEATLQHEATAATLR          | 74            | 17.7                 | 11.6  | 461           | 10.4                 | 4.7   |
|    |             |        |                                         | DSLVSQLSR                  | 58            | NaN                  | 0.0   |               |                      |       |
|    |             |        |                                         | HADSV AELGEQIDNLQR         | 57            | 8.5                  | 10.4  |               |                      |       |
|    |             |        |                                         | IEELEEEIEAER               | 88            | 5.3                  | 5.9   |               |                      |       |
|    |             |        |                                         | NLTEEMAGLDETIK             | 70            | 11.5                 | 7.4   |               |                      |       |
|    |             |        |                                         | TLEDQVSELK                 | 33            | NaN                  | 0.0   |               |                      |       |
|    |             |        |                                         | VVESMQSTLDAEIR             | 81            | 8.9                  | 8.0   |               |                      |       |
| 13 | IP100197711 | 37525  | L-lactate dehydrogenase A chain         | QVVD SAYEVIK               | 57            | 72.0                 | 44.7  | 132           | 112.5                | 57.2  |
|    |             |        |                                         | SADTLWGIQK                 | 75            | 152.9                | 115.5 |               |                      |       |
| 14 | IP100561410 | 36544  | 36 kDa protein                          | QVVD SAYEVIK               | 57            | 72.0                 | 44.7  | 132           | 112.5                | 57.2  |
|    |             |        |                                         | SADTIWGIQK                 | 75            | 152.9                | 115.5 |               |                      |       |
| 15 | IP100212647 | 36813  | GAPDH                                   | IVSNASCTTNCLAPLAK          | 110           | 4.9                  | 2.3   | 173           | 4.5                  | 0.5   |
|    |             |        |                                         | LISWYDNEYGYSNR             | 63            | 4.2                  | 1.6   |               |                      |       |
| 16 | IP100189813 | 42927  | Actin, alpha skeletal muscle            | AVFPSPVGRPR                | 23            | 0.0                  | 0.0   | 202           | 2.3                  | 0.8   |
|    |             |        |                                         | EITALAPSTMK                | 61            | 1.7                  | 0.8   |               |                      |       |
|    |             |        |                                         | SYELPDGQVITIGNER           | 63            | 2.9                  | 1.5   |               |                      |       |
|    |             |        |                                         | VAPEEHPTLLTEAPLNPK         | 55            | 0.0                  | 0.0   |               |                      |       |
| 17 | IP100189819 | 42612  | Actin, cytoplasmic 1                    | EITALAPSTMK                | 61            | 1.7                  | 0.8   | 197           | 1.9                  | 0.9   |
|    |             |        |                                         | SYELPDGQVITIGNER           | 63            | 2.9                  | 1.4   |               |                      |       |
|    |             |        |                                         | VAPEEHPVLLTEAPLNPK         | 50            | 1.0                  | 0.4   |               |                      |       |

|    |             |        |                                        |                    |    |      |      |     |     |     |
|----|-------------|--------|----------------------------------------|--------------------|----|------|------|-----|-----|-----|
| 18 | IPi00476111 | 229596 | Myosin-4                               | HADSV AELGEQIDNLQR | 57 | 13.1 | 9.8  | 226 | 9.2 | 3.9 |
|    |             |        |                                        | IEEEEEIAER         | 88 | 5.3  | 5.7  |     |     |     |
|    |             |        |                                        | VVESMQSTLDAEIR     | 81 | 9.1  | 8.0  |     |     |     |
| 19 | IPi00363719 | 36201  | Heterogeneous nuclear ribonucleoprote  | FGEVVDCTIK         | 61 | 0.3  | 0.5  | 153 | 0.3 | 0.1 |
|    |             |        |                                        | VFVGGLSPDTSEEQIK   | 92 | 0.2  | 0.2  |     |     |     |
| 20 | IPi00191090 | 42780  | Biglycan precursor                     | DLPETLNELHLDHNK    | 36 | 0.8  | 0.5  | 98  | 0.6 | 0.3 |
|    |             |        |                                        | VGINDFCPMGFGVK     | 62 | 0.4  | 0.3  |     |     |     |
| 21 | IPi00189809 | 229943 | Myosin heavy chain, cardiac muscle alp | HADSV AELGEQIDNLQR | 57 | 8.5  | 10.4 | 145 | 6.9 | 2.3 |
|    |             |        |                                        | IEEEEEIAER         | 88 | 5.3  | 5.9  |     |     |     |
| 22 | IPi00368874 | 67742  | LOC299458 protein                      | NVLEGSDEYLVCK      | 77 | 1.5  | 0.5  | 122 | 3.6 | 2.9 |
|    |             |        |                                        | YTATSQVLLSAK       | 45 | 5.6  | 1.2  |     |     |     |
| 23 | IPi00382222 | 60910  | Heterogeneous nuclear ribonucleoprote  | EQILEEFSK          | 33 | 0.6  | 0.1  | 61  | 0.6 | 0.1 |
|    |             |        |                                        | LFVGSIPK           | 36 | 0.6  | 0.2  |     |     |     |

## Supplemental Table S3(G)

RCC10\_Binding specificity ratio\_C8\_C2

|    | Accession   | MW     | Protein Name              | Peptide Sequence         | Peptide Score | Peptide C8/C2 ratio | StDev  | Protein Score | Protein C8/C2 ratio | StDev |
|----|-------------|--------|---------------------------|--------------------------|---------------|---------------------|--------|---------------|---------------------|-------|
| 1  | IPI00063234 | 43998  | PKA RI $\alpha$           | AASAYAVGDVK              | 60            | 1.0                 | 0.29   | 605           | 1.2                 | 0.51  |
|    |             |        |                           | AATIVATSEGLWGLDR         | 51            | 1.4                 | 0.49   |               |                     |       |
|    |             |        |                           | CLVMDVQAIFER             | 53            | 1.7                 | 1.48   |               |                     |       |
|    |             |        |                           | GQYFGEALALVTNKPR         | 58            | 0.0                 | 0.04   |               |                     |       |
|    |             |        |                           | GSFGEALALMYNTPR          | 50            | 1.0                 | 0.52   |               |                     |       |
|    |             |        |                           | GTYDILVTK                | 76            | 0.9                 | 0.52   |               |                     |       |
|    |             |        |                           | LLGPCMDIMK               | 57            | 1.5                 | 1.39   |               |                     |       |
|    |             |        |                           | MFESFIESVPLLK            | 85            | 1.7                 | 0.79   |               |                     |       |
|    |             |        |                           | MFGSSVDLGNLQ             | 48            | 0.0                 | 0.00   |               |                     |       |
|    |             |        |                           | NISHYEEQLVK              | 38            | 1.4                 | 0.87   |               |                     |       |
| 2  | IPI00021831 | 43828  | PKA RI $\alpha$           | GAISAEVYTEEDAASYVR       | 43            | 1.5                 | 1.03   | 262           | 1.0                 | 0.66  |
|    |             |        |                           | HNIQALLK                 | 44            | 1.5                 | 0.25   |               |                     |       |
|    |             |        |                           | MYEEFLSK                 | 52            | 0.4                 | 1.37   |               |                     |       |
|    |             |        |                           | NVLFSLHDDNER             | 34            | 1.7                 | 0.00   |               |                     |       |
|    |             |        |                           | VLGPCSDILK               | 62            | 0.2                 | 0.17   |               |                     |       |
|    |             |        |                           | VSILESLDK                | 37            | 0.7                 | 0.70   |               |                     |       |
|    | IPI00554488 | 44043  | PKA RI $\beta$            | MYEEFLSK                 | 52            | 1.403886            | 1.4082 |               | 1.40389             | 0     |
| 3  | IPI00019223 | 465228 | AKAP9                     | AYINTISLTK               | 51            | 5.4                 | 3.35   | 942           | 4.1                 | 1.80  |
|    |             |        |                           | DMQEQGQFETEMLQK          | 66            | 1.5                 | 0.56   |               |                     |       |
|    |             |        |                           | ESDAMSTQDQHVLFQK         | 53            | 2.3                 | 0.98   |               |                     |       |
|    |             |        |                           | ETIIIEELNTK              | 27            | 3.5                 | 2.78   |               |                     |       |
|    |             |        |                           | EVEIDQLNEQVTK            | 69            | 6.0                 | 3.24   |               |                     |       |
|    |             |        |                           | GSINLETR                 | 38            | 4.0                 | 1.70   |               |                     |       |
|    |             |        |                           | HGEISFLNEEVK             | 54            | 5.7                 | 4.21   |               |                     |       |
|    |             |        |                           | IHQLELQTMK               | 36            | 2.7                 | 0.96   |               |                     |       |
|    |             |        |                           | ILLEVVK                  | 48            | 5.3                 | 4.51   |               |                     |       |
|    |             |        |                           | IQSIPENSVNVAIDHLSK       | 71            | 6.9                 | 6.34   |               |                     |       |
|    |             |        |                           | LLEAISETSSQLEHAK         | 54            | 6.6                 | 8.16   |               |                     |       |
|    |             |        |                           | LLGELQEQIVQK             | 48            | 3.4                 | 3.92   |               |                     |       |
|    |             |        |                           | LLQLESTVSAK              | 41            | 4.2                 | 2.27   |               |                     |       |
|    |             |        |                           | LMNVAINELNIK             | 38            | 0.9                 | 0.00   |               |                     |       |
|    |             |        |                           | QSIHDEISVSSMDASR         | 42            | 4.8                 | 2.22   |               |                     |       |
|    |             |        |                           | SVLLAAFR                 | 47            | 2.2                 | 0.00   |               |                     |       |
|    |             |        |                           | TQLLFSHEEELSK            | 47            | 2.5                 | 0.00   |               |                     |       |
|    |             |        |                           | TSMNAHSLSEEADSLK         | 49            | 5.4                 | 2.99   |               |                     |       |
| 4  | IPI00007411 | 217039 | AKAP11                    | EFMLLSK                  | 49            | 1.4                 | 1.04   | 622           | 1.2                 | 0.27  |
|    |             |        |                           | ELLMFSNK                 | 33            | 1.3                 | 1.29   |               |                     |       |
|    |             |        |                           | ESLPVSGEESQLTPEK         | 56            | 0.5                 | 0.24   |               |                     |       |
|    |             |        |                           | FPDSQNLTHCSLSAAK         | 46            | 1.1                 | 0.51   |               |                     |       |
|    |             |        |                           | MFPVPSSQVK               | 31            | 1.0                 | 0.88   |               |                     |       |
|    |             |        |                           | NVIPDTPPSTPLVPSR         | 36            | 1.3                 | 0.62   |               |                     |       |
|    |             |        |                           | SISCEVLGSLVR             | 67            | 1.4                 | 0.59   |               |                     |       |
|    |             |        |                           | SLTDSCLFEK               | 41            | 1.3                 | 0.98   |               |                     |       |
|    |             |        |                           | TSVTTSISEPWQR            | 39            | 1.4                 | 0.78   |               |                     |       |
|    |             |        |                           | YTLDTFLHQK               | 45            | 1.2                 | 0.64   |               |                     |       |
| 5  | IPI00032064 | 124528 | AKAP2                     | LWAEDGEFTSAR             | 34            | 1.5                 | 3.91   | 100           | 1.3                 | 0.25  |
|    |             |        |                           | WWNPPQEK                 | 30            | 1.1                 | 0.37   |               |                     |       |
| 6  | IPI00022585 | 99512  | AKAP1                     | SIPLECLSSPK              | 39            | 1.4                 | 0.65   | 39            | 1.4                 | 0.00  |
| 7  | IPI00003842 | 204330 | MAP2                      | LSVEIPCPAVSEADLATDER     | 38            | 1.3                 | 0.00   | 38            | 1.3                 | 0.00  |
| 8  | IPI00337544 | 131716 | PDE4DIP                   | EQLLQEFR                 | 42            | 3.1                 | 2.57   | 235           | 5.5                 | 2.96  |
|    |             |        |                           | EVEDLSATLLCK             | 33            | 1.8                 | 1.41   |               |                     |       |
|    |             |        |                           | LNSHETTITQSVSDSHLAEQEK   | 36            | 8.1                 | 3.54   |               |                     |       |
|    |             |        |                           | QCQQVFVEAAAHSEQQK        | 82            | 6.2                 | 4.38   |               |                     |       |
|    |             |        |                           | TLEANEMLLEK              | 42            | 8.4                 | 11.71  |               |                     |       |
| 9  | IPI00219018 | 36827  | GAPDH                     | GALQNIIPASTGAAK          | 71            | 15.3                | 15.49  | 219           | 24.8                | 8.19  |
|    |             |        |                           | IISNASCTTNCLAPLAK        | 116           | 29.2                | 26.73  |               |                     |       |
|    |             |        |                           | LISWYDNEFGYSNR           | 32            | 29.8                | 20.68  |               |                     |       |
| 10 | IPI00217966 | 37763  | lactate dehydrogenase A   | FIPNVVK                  | 37            | 36.5                | 30.21  | 245           | 43.1                | 23.87 |
|    |             |        |                           | LGVHPLSCHGWVLGEHGDSSVPVW | 22            | 6.2                 | 0.00   |               |                     |       |
|    |             |        |                           | LVIIITAGAR               | 38            | 45.6                | 35.34  |               |                     |       |
|    |             |        |                           | QVVESAYEVIK              | 49            | 60.2                | 43.04  |               |                     |       |
|    |             |        |                           | SADTLWGIQK               | 73            | 67.0                | 44.00  |               |                     |       |
| 11 | IPI00604590 | 33551  | NME1-NME2 protein         | GDFCIQVGR                | 59            | 1.6                 | 0.76   | 217           | 1.4                 | 0.28  |
|    |             |        |                           | GLVGEIHK                 | 51            | 1.2                 | 0.52   |               |                     |       |
| 12 | IPI00025512 | 23050  | Heat-shock protein beta-1 | LATQSNIEITPVTFESR        | 86            | 1.3                 | 0.68   | 186           | 1.3                 | 0.27  |
|    |             |        |                           | LFDQAFGLPR               | 45            | 1.5                 | 0.64   |               |                     |       |
|    |             |        |                           | VSLDVNHFAPDELTVK         | 55            | 1.0                 | 0.00   |               |                     |       |
| 13 | IPI00019502 | 233346 | Myosin-9                  | ALELDSNLYR               | 43            | 2.1                 | 2.09   | 471           | 1.7                 | 0.51  |
|    |             |        |                           | FLSNGHVTIPGQQDK          | 36            | 1.9                 | 0.44   |               |                     |       |

|    |             |        |                                              |                         |    |       |        |     |       |       |
|----|-------------|--------|----------------------------------------------|-------------------------|----|-------|--------|-----|-------|-------|
|    |             |        |                                              | GDLPFVVR                | 57 | 2.2   | 1.37   |     |       |       |
|    |             |        |                                              | IAQLEEQLDNETK           | 86 | 1.0   | 0.67   |     |       |       |
|    |             |        |                                              | IMGIPPEEQMGLLR          | 31 | 1.2   | 0.78   |     |       |       |
|    |             |        |                                              | NFINNPLAQADWAAK         | 38 | 2.1   | 2.04   |     |       |       |
|    |             |        |                                              | VIQYLAYVASSHK           | 63 | 2.1   | 1.60   |     |       |       |
|    |             |        |                                              | VSHLLGINVDFTR           | 43 | 2.3   | 1.41   |     |       |       |
| 14 | IPI00479217 | 91572  | HNRP isoform b                               | GYFEYIEENK              | 45 | 81.8  | 63.61  | 327 | 114.2 | 26.32 |
|    |             |        |                                              | MCLFAGFQR               | 44 | 127.4 | 49.01  |     |       |       |
|    |             |        |                                              | NFILDQTNVSAQAQR         | 37 | 93.0  | 61.49  |     |       |       |
|    |             |        |                                              | SSGPTSLFAVTVAPPGAR      | 87 | 146.2 | 63.23  |     |       |       |
|    |             |        |                                              | YNILGTNTIMDK            | 71 | 122.7 | 149.63 |     |       |       |
| 15 | IPI00013485 | 32290  | 40S ribosomal protein S2                     | LSIVPVR                 | 70 | 47.4  | 26.32  | 159 | 47.4  | 0.00  |
|    |             |        |                                              | SPYQEFTHLVK             | 63 | 0.0   | 0.00   |     |       |       |
| 16 | IPI00550689 | 56613  | UPF0027 protein C22orf28                     | LMFEELR                 | 46 | 4.3   | 0.00   | 352 | 3.6   | 3.22  |
|    |             |        |                                              | QIGNVAALPGIVHR          | 54 | 6.4   | 4.30   |     |       |       |
| 17 | IPI00294398 | 35210  | Isoform 1 of Hydroxyacyl-coenzyme A dehy     | FIVDGVHEMDAENPLHQPSPLNK | 49 | 1.2   | 0.00   | 102 | 0.8   | 0.56  |
|    |             |        |                                              | LLVPYLMEAIR             | 53 | 0.4   | 0.29   |     |       |       |
| 18 | IPI00039626 | 119985 | Isoform D of UPF0318 protein FAM120A         | NIQDTSDLDAIAK           | 79 | 0.0   | 0.38   | 171 | 2.7   | 2.93  |
|    |             |        |                                              | QSVLEGLSFSR             | 26 | 2.2   | 0.00   |     |       |       |
|    |             |        |                                              | SLTTSQYLMHEVAK          | 31 | 5.8   | 5.64   |     |       |       |
| 19 | IPI00093057 | 51563  | Coproporphyrinogen III oxidase, mitochond    | AGVSIQVHGNLSEEAQK       | 62 | 0.1   | 0.11   | 125 | 0.2   | 0.08  |
|    |             |        |                                              | EGGGGISCVLQDGGCVFEK     | 32 | 0.2   | 0.11   |     |       |       |
|    |             |        |                                              | NPHAPTIHFNYR            | 31 | 0.2   | 0.08   |     |       |       |
| 20 | IPI00000874 | 22885  | Peroxiredoxin-1                              | GLFIIDDK                | 52 | 0.6   | 0.00   | 111 | 0.6   | 0.03  |
|    |             |        |                                              | LVQAFQFTDK              | 59 | 0.7   | 0.74   |     |       |       |
| 21 | IPI00011253 | 27431  | 40S ribosomal protein S3                     | AELNEFLTR               | 35 | 3.4   | 0.00   | 166 | 5.6   | 2.38  |
|    |             |        |                                              | FVADGIFK                | 32 | 3.6   | 2.16   |     |       |       |
|    |             |        |                                              | GGKPEPPAMPQPVPPTA       | 41 | 5.0   | 2.55   |     |       |       |
|    |             |        |                                              | LLGGLAVR                | 24 | 8.3   | 4.30   |     |       |       |
| 22 | IPI00009342 | 193545 | Ras GTPase-activating-like protein IQGAP     | FLSAIVSSVDK             | 45 | 1.2   | 0.00   | 102 | 1.2   | 0.00  |
|    |             |        |                                              | ITLQDQVVSISK            | 57 | 1.1   | 0.00   |     |       |       |
| 23 | IPI00219217 | 37526  | L-lactate dehydrogenase B chain              | IVVVTAGVR               | 41 | 45.3  | 0.00   | 102 | 46.3  | 0.00  |
|    |             |        |                                              | SADTLWDIQK              | 61 | 46.3  | 43.20  |     |       |       |
| 24 | IPI00465361 | 24901  | 60S ribosomal protein L13                    | GFSLEELR                | 53 | 3.8   | 1.61   | 105 | 3.8   | 0.00  |
|    |             |        |                                              | LATQLTGPVMPVR           | 52 | 0.4   | 0.00   |     |       |       |
| 25 | IPI00013070 | 97287  | HNRP U-like protein 1                        | EALGGQALYPHVLVK         | 69 | 0.7   | 0.00   | 93  | 1.7   | 1.40  |
|    |             |        |                                              | WMGIAFR                 | 34 | 2.6   | 0.00   |     |       |       |
| 26 | IPI00219330 | 76585  | Isoform 5 of Interleukin enhancer-binding fa | AYAALAALEK              | 53 | 2.3   | 1.24   | 108 | 1.9   | 0.50  |
|    |             |        |                                              | VLGMDPLPSK              | 31 | 1.6   | 0.80   |     |       |       |
| 27 | IPI00021439 | 42612  | Actin, cytoplasmic 1                         | AVFSPSIVGRPR            | 45 | 0.0   | 0.00   | 83  | 0.5   | 0.58  |
|    |             |        |                                              | VAPEEHPVLLTEAPLNPK      | 38 | 0.9   | 0.38   |     |       |       |
| 28 | IPI00166768 | 38214  | TUBA6 protein                                | TIGGGDDSFNTFFSETGAGK    | 38 | 0.7   | 0.54   | 72  | 0.6   | 0.02  |
|    |             |        |                                              | VGINYQPPTVPPGGDLAK      | 34 | 0.6   | 0.35   |     |       |       |
| 29 | IPI00012074 | 72446  | Heterogeneous nuclear ribonucleoprotein F    | ENILEEFSK               | 35 | 2.3   | 1.30   | 94  | 1.5   | 0.72  |
|    |             |        |                                              | GYAFITFCGK              | 31 | 1.2   | 0.65   |     |       |       |

Supplemental Table S3 (H)

RCC10\_binding specificity ratio\_C8\_C8-OCH<sub>3</sub>

|    | Accession   | MW     | Protein Name                                  | Peptide Sequence          | Peptide Score | Peptide C8/C8-OCH <sub>3</sub> ratio | StDev | Protein Score | Protein C8/C8-OCH <sub>3</sub> ratio | StDev |
|----|-------------|--------|-----------------------------------------------|---------------------------|---------------|--------------------------------------|-------|---------------|--------------------------------------|-------|
| 1  | IPI00063234 | 43998  | PKA RII $\alpha$                              | AASAYAVGDVK               | 52            | 6.09                                 | 0.46  | 799           | 5.60                                 | 0.47  |
|    |             |        |                                               | AATIVATSEGLWGLDR          | 142           | 6.40                                 | 5.71  |               |                                      |       |
|    |             |        |                                               | CLVMDVQAFER               | 39            | 9.44                                 | 3.18  |               |                                      |       |
|    |             |        |                                               | DILFK                     | 29            | 7.24                                 | 0.27  |               |                                      |       |
|    |             |        |                                               | GQYFGELALVTNKPR           | 86            | 5.25                                 | 0.05  |               |                                      |       |
|    |             |        |                                               | GSFGELALMYNTPR            | 94            | 9.01                                 | 0.42  |               |                                      |       |
| 2  | IPI00021831 | 43828  | PKA RII $\alpha$                              | GAISAEVYTEEDAASYVR        | 106           | 1.01                                 | 0.33  | 359           | 0.23                                 | 0.44  |
|    |             |        |                                               | HNIQALLK                  | 24            | 1.20                                 | 0.00  |               |                                      |       |
|    |             |        |                                               | LTVADALEPVQFEDGQK         | 90            | 0.51                                 | 0.05  |               |                                      |       |
|    |             |        |                                               | MYEEFLSK                  | 57            | 0.39                                 | 0.32  |               |                                      |       |
|    |             |        |                                               | VLGPCSDILK                | 34            | 0.22                                 | 0.73  |               |                                      |       |
|    |             |        |                                               | VSILESLDK                 | 48            | 0.62                                 | 0.59  |               |                                      |       |
| 3  | IPI00787996 | 44027  | PKA RII $\beta$                               | IVVQGEPPGDDFYIITEGTASVLQR | 52            | 0.61                                 | 0.00  | 260           | 0.08                                 | 0.06  |
|    |             |        |                                               | MYEEFLSK                  | 57            | 0.61                                 | 0.09  |               |                                      |       |
|    |             |        |                                               | VLGPCSEILK                | 27            | 0.40                                 | 0.00  |               |                                      |       |
|    |             |        |                                               | VSILESLEK                 | 29            | 0.81                                 | 0.08  |               |                                      |       |
| 4  | IPI00019223 | 465228 | AKAP9                                         | EVEIDQLNEQVTK             | 88            | 4.14                                 | 1.21  | 1550          | 4.60                                 | 1.18  |
|    |             |        |                                               | GSIIINLETR                | 45            | 3.24                                 | 2.71  |               |                                      |       |
|    |             |        |                                               | HVLGILDR                  | 41            | 4.18                                 | 3.05  |               |                                      |       |
|    |             |        |                                               | IQEQGVEYQAAMECLQK         | 52            | 5.37                                 | 1.20  |               |                                      |       |
|    |             |        |                                               | IQSIPENSVNVAIDHLSK        | 56            | 4.36                                 | 1.39  |               |                                      |       |
|    |             |        |                                               | IVELLNETEK                | 43            | 6.61                                 | 6.18  |               |                                      |       |
| 5  | IPI00007411 | 217039 | AKAP11                                        | EFMLLSK                   | 51            | 3.40                                 | 0.66  | 736           | 3.50                                 | 0.38  |
|    |             |        |                                               | ESLPVSGEESQLTPEK          | 97            | 4.10                                 | 0.26  |               |                                      |       |
|    |             |        |                                               | GVSSCTNALYHLAIK           | 62            | 2.90                                 | 0.69  |               |                                      |       |
|    |             |        |                                               | SFSEDFVQSVK               | 77            | 3.80                                 | 0.83  |               |                                      |       |
| 6  | IPI00032064 | 124528 | AKAP2                                         | NLMQTLMEDYETHK            | 55            | 0.93                                 | 0.79  | 104           | 0.93                                 | 0.00  |
| 7  | IPI00022585 | 99512  | AKAP1                                         | SIPLECLSSPK               | 51            | 1.05                                 | 0.44  | 98            | 1.05                                 | 0.00  |
| 8  | IPI00019502 | 233346 | Myosin-9                                      | ANLQIDQINTDLNLER          | 100           | 0.65                                 | 0.37  | 875           | 0.77                                 | 0.25  |
|    |             |        |                                               | DMFQETMEAMR               | 77            | 0.75                                 | 0.87  |               |                                      |       |
|    |             |        |                                               | FLSNGHVTIPGQQDK           | 34            | 0.78                                 | 0.46  |               |                                      |       |
|    |             |        |                                               | GDLPFVVR                  | 63            | 1.05                                 | 0.82  |               |                                      |       |
|    |             |        |                                               | HSQAVEELAEQLEQTK          | 59            | 0.46                                 | 2.58  |               |                                      |       |
|    |             |        |                                               | IAEFTTNLTETEEK            | 83            | 0.84                                 | 0.59  |               |                                      |       |
|    |             |        |                                               | IAQLEEQLDNETK             | 108           | 0.74                                 | 0.90  |               |                                      |       |
|    |             |        |                                               | IMGIPPEEQMGLLR            | 43            | 0.51                                 | 0.27  |               |                                      |       |
|    |             |        |                                               | NLPIYSEIIVEMYK            | 53            | 1.03                                 | 0.78  |               |                                      |       |
|    |             |        |                                               | NMDPLNDNIATLLHQSSDK       | 44            | 0.62                                 | 0.63  |               |                                      |       |
|    |             |        |                                               | QIATLHAQVADMK             | 32            | 1.37                                 | 0.84  |               |                                      |       |
|    |             |        |                                               | TDLLLEPYNK                | 53            | 0.79                                 | 0.60  |               |                                      |       |
|    |             |        |                                               | VIQYLAYVASSHK             | 59            | 0.75                                 | 0.74  |               |                                      |       |
|    |             |        |                                               | VSHLLGINVDFTR             | 42            | 0.40                                 | 0.85  |               |                                      |       |
|    |             |        |                                               | VVFQEFR                   | 25            | 0.74                                 | 0.24  |               |                                      |       |
| 9  | IPI00479217 | 91572  | heterogeneous nuclear ribonucleoprotein       | DCEVVMIGLPGAGK            | 97            | 26.40                                | 35.13 | 589           | 21.07                                | 7.36  |
|    |             |        |                                               | GYFEYIEENK                | 51            | 10.83                                | 10.04 |               |                                      |       |
|    |             |        |                                               | MCLFAGFQR                 | 44            | 22.10                                | 17.95 |               |                                      |       |
|    |             |        |                                               | NFILDQTNVSAQAQR           | 92            | 28.44                                | 27.87 |               |                                      |       |
|    |             |        |                                               | SPQPPVEEEDHFDFTVCLDTYN    | 32            | 0.00                                 | 0.00  |               |                                      |       |
|    |             |        |                                               | SSGPTSLFAVTVAPPGAR        | 68            | 28.92                                | 15.48 |               |                                      |       |
|    |             |        |                                               | YNILGTNTIMDK              | 77            | 13.08                                | 20.28 |               |                                      |       |
| 10 | IPI00337544 | 131716 | phosphodiesterase 4D interacting protein      | ALQQLQEELQNK              | 51            | 1.12                                 | 0.57  | 550           | 1.80                                 | 1.11  |
|    |             |        |                                               | EQLLQEFR                  | 54            | 1.34                                 | 0.71  |               |                                      |       |
|    |             |        |                                               | LPGQSEIAEELCQR            | 74            | 1.41                                 | 0.74  |               |                                      |       |
|    |             |        |                                               | LNSHETTITQQSVSDSHLAEQEK   | 53            | 1.56                                 | 0.47  |               |                                      |       |
|    |             |        |                                               | QCQVFVEAAAHSESEQK         | 61            | 2.06                                 | 0.79  |               |                                      |       |
|    |             |        |                                               | SSLPGAKPGPSMTDGVSSGFLNR   | 63            | 0.34                                 | 0.00  |               |                                      |       |
|    |             |        |                                               | STLGDLDTVAGLEK            | 86            | 3.95                                 | 1.48  |               |                                      |       |
|    |             |        |                                               | TLEANEMLLEK               | 59            | 3.48                                 | 2.46  |               |                                      |       |
| 11 | IPI00217966 | 37763  | lactate dehydrogenase A                       | DLADELALVDVIEDK           | 116           | 106.05                               | 0.00  | 478           | 76.42                                | 42.21 |
|    |             |        |                                               | DQLIYNLLK                 | 39            | 49.64                                | 0.00  |               |                                      |       |
|    |             |        |                                               | LLIVSNPVDILTYVAWK         | 126           | 14.03                                | 0.00  |               |                                      |       |
|    |             |        |                                               | LVIIITAGAR                | 38            | 134.92                               | 64.86 |               |                                      |       |
|    |             |        |                                               | QVVESAYEVIK               | 66            | 76.58                                | 25.80 |               |                                      |       |
|    |             |        |                                               | SADTLWGIQK                | 71            | 77.30                                | 36.25 |               |                                      |       |
| 12 | IPI00093057 | 51563  | Coproporphyrinogen III oxidase, mitochondrial | AGVSISVVHGNLSEEAAK        | 90            | 0.01                                 | 0.00  | 0.078181      | 0.08                                 | 0.08  |
|    |             |        |                                               | AVVPSYIPLVK               | 33            | 0.01                                 | 0.00  |               |                                      |       |
|    |             |        |                                               | EGGGGISCVLQDGCVFEK        | 101           | 0.08                                 | 0.03  |               |                                      |       |
|    |             |        |                                               | FGLFTPGSR                 | 30            | 0.02                                 | 0.01  |               |                                      |       |



|    |             |        |                                       |                           |     |        |       |     |       |       |
|----|-------------|--------|---------------------------------------|---------------------------|-----|--------|-------|-----|-------|-------|
|    |             |        |                                       | LPFCAMGVSSVIHPK           | 42  | 0.18   | 0.00  |     |       |       |
|    |             |        |                                       | NPHAPTIHFNYR              | 41  | 0.16   | 0.00  |     |       |       |
| 13 | IPI00219757 | 23802  | Glutathione S-transferase P           | DQQEAAALVDMVNDGVEDLR      | 124 | 0.11   | 0.12  | 357 | 0.06  | 0.07  |
|    |             |        |                                       | FQDGDLTLYQSNTILR          | 114 | 0.02   | 0.00  |     |       |       |
| 14 | IPI00219018 | 36827  | GAPDH                                 | GALQNIIPASTGAAK           | 55  | 26.77  | 5.90  | 439 | 34.29 | 32.10 |
|    |             |        |                                       | IISNASCTTNCLAPLAK         | 120 | 79.04  | 0.00  |     |       |       |
|    |             |        |                                       | VIHDNFGIVEGLMTTVHAIATQK   | 71  | 2.67   | 1.70  |     |       |       |
|    |             |        |                                       | WGDAGAEYVVESTGVFTTMEK     | 76  | 28.67  | 0.00  |     |       |       |
| 15 | IPI00215965 | 39370  | heterogeneous nuclear ribonucleopro   | GFAFVTFFDDHDSVDK          | 85  | 0.41   | 0.22  | 319 | 0.29  | 0.17  |
|    |             |        |                                       | LFIGGLSFETTDESLR          | 113 | 0.17   | 0.21  |     |       |       |
|    |             |        |                                       | SSGPYGGGGQYFAKPR          | 38  | 0.21   | 0.00  |     |       |       |
| 16 | IPI00013485 | 32290  | 40S ribosomal protein S2              | AFVAIGDYNGHVGLGVK         | 68  | 3.52   | 0.87  | 185 | 3.52  | 0.00  |
|    |             |        |                                       | SPYQFTDHLVK               | 58  | 3.12   | 0.00  |     |       |       |
|    |             |        |                                       | TYSYLTPDLWK               | 59  | 2.91   | 0.00  |     |       |       |
| 17 | IPI00021439 | 42612  | Actin, cytoplasmic 1                  | DLYANTVLSGGTMYPGIADR      | 79  | 0.66   | 0.43  | 340 | 0.43  | 0.24  |
|    |             |        |                                       | IWHHTFYNELR               | 43  | 0.19   | 0.17  |     |       |       |
|    |             |        |                                       | SYELPDGQVITIGNER          | 73  | 0.20   | 0.00  |     |       |       |
|    |             |        |                                       | TTGIVMDSGDGVTHTVPIYEGYALP | 57  | 0.51   | 0.22  |     |       |       |
| 18 | IPI00219217 | 37526  | L-lactate dehydrogenase B chain       | LIAPVAEEEEATVPNNK         | 61  | 15.93  | 13.78 | 282 | 43.86 | 56.75 |
|    |             |        |                                       | MVVESAYEVIK               | 50  | 109.17 | 0.00  |     |       |       |
|    |             |        |                                       | SLADELALVDVLEDK           | 87  | 6.49   | 4.23  |     |       |       |
| 19 | IPI00217030 | 30461  | 40S ribosomal protein S4, X isoform   | FDTGNLCMVTGGANLGR         | 129 | 3.51   | 0.97  | 281 | 3.91  | 2.82  |
|    |             |        |                                       | LSNIFVIGK                 | 35  | 6.91   | 2.89  |     |       |       |
|    |             |        |                                       | VNDTIQIDLETGK             | 82  | 1.30   | 0.46  |     |       |       |
| 20 | IPI00009342 | 193545 | Ras GTPase-activating-like protein IC | ATFYGEQVDYYK              | 58  | 1.31   | 0.88  | 267 | 2.65  | 1.77  |
|    |             |        |                                       | EQLSDMMINK                | 70  | 1.91   | 1.08  |     |       |       |
|    |             |        |                                       | FLSAIVSSVDK               | 35  | 1.91   | 2.40  |     |       |       |
|    |             |        |                                       | LIFQMPQNK                 | 35  | 2.36   | 0.00  |     |       |       |
|    |             |        |                                       | SNQQLENDLNLMEDIK          | 69  | 5.75   | 0.00  |     |       |       |
| 21 | IPI00011253 | 27431  | 40S ribosomal protein S3              | GLCAIAQAESLR              | 82  | 2.05   | 0.79  | 258 | 1.75  | 0.61  |
|    |             |        |                                       | IMLPWDPTGK                | 52  | 1.58   | 0.48  |     |       |       |
|    |             |        |                                       | LLGGLAVR                  | 40  | 2.39   | 0.89  |     |       |       |
|    |             |        |                                       | TEIILLATR                 | 56  | 0.98   | 0.67  |     |       |       |
| 22 | IPI00003865 | 72624  | Isoform 1 of Heat shock cognate 71 k  | DAGTIAGLNVL               | 63  | 0.32   | 0.30  | 219 | 0.32  | 0.06  |
|    |             |        |                                       | IINEPTAAAIAYGLDK          | 108 | 0.39   | 0.15  |     |       |       |
|    |             |        |                                       | SQIHDIIVLGGSTR            | 48  | 0.26   | 0.00  |     |       |       |
| 23 | IPI00011654 | 50544  | Tubulin beta chain                    | AILVDLEPGTMDSVR           | 69  | 0.59   | 0.00  | 237 | 0.39  | 0.14  |
|    |             |        |                                       | LHFFMPGFAPLTSR            | 52  | 0.30   | 0.12  |     |       |       |
|    |             |        |                                       | NSSYFVEWIPNNVK            | 77  | 0.31   | 0.22  |     |       |       |
|    |             |        |                                       | YLTVAAVFR                 | 39  | 0.35   | 0.34  |     |       |       |
| 24 | IPI00550689 | 56613  | UPF0027 protein C22orf28              | LADMGIAR                  | 41  | 6.45   | 4.53  | 274 | 5.67  | 1.10  |
|    |             |        |                                       | NLDFQDVLDK                | 42  | 4.90   | 2.73  |     |       |       |
| 25 | IPI00334775 | 87319  | 85 kDa protein                        | ADLNNLGTIAK               | 49  | 0.28   | 0.00  | 198 | 0.43  | 0.31  |
|    |             |        |                                       | HLEINPDHPIVETLR           | 42  | 0.79   | 0.00  |     |       |       |
|    |             |        |                                       | TLTLVDTGIGMTK             | 68  | 0.21   | 0.00  |     |       |       |
| 26 | IPI00180675 | 51348  | Tubulin alpha-3 chain                 | AVFVDLEPTVIDEVR           | 70  | 0.42   | 0.24  | 163 | 0.39  | 0.34  |
|    |             |        |                                       | NLDIERPTYTNLNR            | 36  | 0.03   | 0.00  |     |       |       |
|    |             |        |                                       | VGINYQPPTVVPGGDLAK        | 57  | 0.72   | 0.23  |     |       |       |
| 27 | IPI00465361 | 24901  | 60S ribosomal protein L13             | GFSLLEELR                 | 51  | 3.11   | 1.18  | 150 | 14.81 | 18.97 |
|    |             |        |                                       | LATQLTGPVMPVR             | 77  | 36.69  | 11.47 |     |       |       |
| 28 | IPI00293655 | 85115  | ATP-dependent RNA helicase DDX1       | FLICTDVAAR                | 32  | 3.95   | 0.00  | 216 | 2.83  | 1.12  |
|    |             |        |                                       | FNFGEEEFK                 | 30  | 2.95   | 0.00  |     |       |       |
|    |             |        |                                       | GIDIHGVPPYVINVTLPDEK      | 44  | 3.14   | 1.47  |     |       |       |
|    |             |        |                                       | VGWSTMQASLDLGTDK          | 66  | 1.29   | 0.00  |     |       |       |
| 29 | IPI00028888 | 39506  | Isoform 1 of Heterogeneous nuclear r  | GFGFVLFK                  | 47  | 0.13   | 0.06  | 112 | 0.18  | 0.07  |
|    |             |        |                                       | IFVGGDSPDTPEEK            | 65  | 0.22   | 0.13  |     |       |       |
| 30 | IPI00221089 | 17613  | 40S ribosomal protein S13             | GLAPDLPEDLYHLIK           | 67  | 5.65   | 0.00  | 120 | 7.44  | 6.44  |
|    |             |        |                                       | LILIESR                   | 26  | 2.08   | 1.11  |     |       |       |
|    |             |        |                                       | SVPTWLK                   | 37  | 14.58  | 10.06 |     |       |       |
| 31 | IPI00026260 | 17793  | Nucleoside diphosphate kinase B       | GDFCIQVGR                 | 52  | 3.44   | 1.18  | 178 | 2.58  | 1.21  |
|    |             |        |                                       | GLVGEIHK                  | 40  | 1.72   | 0.83  |     |       |       |
| 32 | IPI00396485 | 51797  | Elongation factor 1-alpha 1           | SGDAAIVDMVPGKPMCVESFSDYP  | 54  | 0.37   | 0.30  | 158 | 0.60  | 0.52  |
|    |             |        |                                       | VETGVLPKPGMVVTFAPVNVVTEVK | 53  | 1.20   | 0.47  |     |       |       |
|    |             |        |                                       | YYVTIIDAPGHR              | 51  | 0.24   | 0.00  |     |       |       |
| 33 | IPI00382470 | 101024 | Heat shock protein HSP 90-alpha 2     | ADLNNLGTIAK               | 49  | 0.28   | 0.00  | 156 | 0.25  | 0.05  |
|    |             |        |                                       | TLTIVDTGIGMTK             | 68  | 0.21   | 0.00  |     |       |       |
| 34 | IPI00301936 | 36773  | ELAV-like protein 1                   | DANLYISGLPR               | 66  | 0.28   | 0.00  | 135 | 0.25  | 0.04  |
|    |             |        |                                       | SLFSSIGEVESAK             | 69  | 0.22   | 0.22  |     |       |       |
| 35 | IPI00418471 | 54190  | Vimentin                              | ILLAELEQLK                | 53  | 1.74   | 0.33  | 118 | 1.74  | 0.00  |
|    |             |        |                                       | NLQEAEEWYK                | 65  | 1.69   | 0.00  |     |       |       |
| 36 | IPI00479186 | 59535  | pyruvate kinase 3 isoform 1           | GDLGIEPAEK                | 43  | 0.15   | 0.00  | 172 | 0.33  | 0.22  |
|    |             |        |                                       | IYVDDGLISLQVK             | 42  | 0.57   | 0.00  |     |       |       |
|    |             |        |                                       | NTGICTIGPASR              | 50  | 0.26   | 0.16  |     |       |       |
| 37 | IPI00030910 | 73720  | GPI-anchored membrane protein 1       | SFMALSQDIQK               | 46  | 2.85   | 0.00  | 100 | 2.90  | 0.00  |
|    |             |        |                                       | YQEVTTNNLEFAK             | 54  | 2.97   | 0.00  |     |       |       |
| 38 | IPI00221092 | 16895  | 40S ribosomal protein S16             | GPLQSVQVFR                | 61  | 2.73   | 0.86  | 104 | 1.73  | 1.42  |

|    |             |       |                                                          |                      |    |       |      |     |      |      |
|----|-------------|-------|----------------------------------------------------------|----------------------|----|-------|------|-----|------|------|
|    |             |       |                                                          | LLEPVLLGK            | 43 | 0.72  | 0.38 |     |      |      |
| 39 | IPI00011913 | 31525 | Heterogeneous nuclear ribonucleoprotein L10              | GDVAEGDLIEHFSQFGTVEK | 33 | 0.62  | 0.00 | 87  | 0.60 | 0.03 |
|    |             |       |                                                          | LFIGGLNVQTSSEGLR     | 54 | 0.58  | 0.00 |     |      |      |
| 40 | IPI00175098 | 25646 | similar to ribosomal protein L10                         | FNADEFEDMVAEK        | 76 | 11.26 | 4.70 | 100 | 7.66 | 5.09 |
|    |             |       |                                                          | VHIGQVIMSIR          | 34 | 4.05  | 0.00 |     |      |      |
| 41 | IPI00031691 | 22468 | 60S ribosomal protein L9                                 | FLDGIYVSEK           | 30 | 1.98  | 0.00 | 81  | 1.87 | 0.17 |
|    |             |       |                                                          | TICSHVQNMIK          | 51 | 1.75  | 0.85 |     |      |      |
| 42 | IPI00012074 | 72446 | Heterogeneous nuclear ribonucleoprotein L10              | AGPIWDLR             | 34 | 1.02  | 0.63 | 133 | 1.10 | 0.71 |
|    |             |       |                                                          | LMMDPLSGQNR          | 34 | 0.87  | 0.00 |     |      |      |
|    |             |       |                                                          | NLATTVTTEEILEK       | 38 | 2.10  | 1.63 |     |      |      |
|    |             |       |                                                          | SAFLCGVMK            | 37 | 0.43  | 0.00 |     |      |      |
| 43 | IPI00011274 | 47393 | heterogeneous nuclear ribonucleoprotein L10              | DLTEYLSR             | 42 | 0.52  | 0.00 | 89  | 0.33 | 0.28 |
|    |             |       |                                                          | GFGFVLFK             | 47 | 0.13  | 0.06 |     |      |      |
| 44 | IPI00018140 | 71105 | Isoform 1 of Heterogeneous nuclear ribonucleoprotein L10 | GYAFVTCTK            | 41 | 0.53  | 0.00 | 102 | 0.66 | 0.32 |
|    |             |       |                                                          | SAFLCGVMK            | 37 | 0.43  | 0.00 |     |      |      |
| 45 | IPI00013070 | 97287 | Isoform 1 of Heterogeneous nuclear ribonucleoprotein L10 | AIVICPTDEDLK         | 36 | 1.03  | 0.31 | 60  | 1.26 | 0.33 |
|    |             |       |                                                          | WMGIAFR              | 34 | 1.49  | 0.00 |     |      |      |

Supplemental Table S3 (I)

Rat Testicle tissue\_Binding specificity ratio\_C8\_C8-OCH<sub>3</sub>

|    | Accession   | MW     | Protein Name                  | Peptide Sequence         | Peptide Score | Peptide C8-OCH3/C8 ratio | StDev | Peptide C8/C8-OCH3 ratio | Protein Score | Protein C8/C8-OCH3 ratio | StDev |
|----|-------------|--------|-------------------------------|--------------------------|---------------|--------------------------|-------|--------------------------|---------------|--------------------------|-------|
| 1  | IPI00196684 | 45797  | PKA RI $\alpha$               | AATIVATSDGSLWGLDR        | 130           | 0.108                    | 0.04  | 9.29                     | 1444          | 10.6                     | 2.92  |
|    |             |        |                               | AATIVATSDGSLWGLDRVTFR    | 48            | 0.112                    | 0.00  | 8.90                     |               |                          |       |
|    |             |        |                               | CLVMDVQAFER              | 73            | 0.234                    | 0.00  | 4.27                     |               |                          |       |
|    |             |        |                               | GQYFGELALVTNKPR          | 85            | 0.071                    | 0.00  | 14.05                    |               |                          |       |
|    |             |        |                               | GSFGELALMYNTPR           | 122           | 0.104                    | 0.01  | 9.65                     |               |                          |       |
|    |             |        |                               | IVKTDEHVIDQGDDGDNFVIER   | 91            | 0.088                    | 0.00  | 11.42                    |               |                          |       |
|    |             |        |                               | LLGPCMDIMK               | 59            | 0.082                    | 0.00  | 12.16                    |               |                          |       |
|    |             |        |                               | MFGSNLDDLDPGQ            | 47            | 0.070                    | 0.24  | 14.31                    |               |                          |       |
|    |             |        |                               | NLDQEQLSQVLDAMFEK        | 132           | 0.083                    | 0.00  | 12.11                    |               |                          |       |
|    |             |        |                               | QPPDLVDFAVEYFTR          | 59            | 0.098                    | 0.04  | 10.16                    |               |                          |       |
| 2  | IPI00231770 | 43296  | PKA RI $\alpha$               | RGAISSAEVYTEEDAASYVR     | 87            | 1.315                    | 0.90  | 0.76                     | 512           | 0.7                      | 0.22  |
|    |             |        |                               | RNIQQYNSFVLSV            | 39            | 1.826                    | 0.00  | 0.55                     |               |                          |       |
|    |             |        |                               | SLRECELYVQKHNIQALLK      | 49            | 1.100                    | 0.00  | 0.91                     |               |                          |       |
|    |             |        |                               | VLGPCSDILK               | 43            | 2.461                    | 0.90  | 0.41                     |               |                          |       |
| 3  | IPI00764045 | 44984  | PKA RI $\beta$                | AATITATSPGALWGLDRVTFR    | 40            | 0.132                    | 0.04  | 7.55                     | 749           | 9.6                      | 8.34  |
|    |             |        |                               | AATITATSPGALWGLDRVTFRR   | 31            | 0.217                    | 0.08  | 4.61                     |               |                          |       |
|    |             |        |                               | CLAMDVQAFER              | 64            | 0.038                    | 0.00  | 26.08                    |               |                          |       |
|    |             |        |                               | EGEHVIDQGDDGDNFYVIDR     | 87            | 0.206                    | 0.00  | 4.86                     |               |                          |       |
|    |             |        |                               | HQPADLLEFALQHFTR         | 56            | 0.216                    | 0.00  | 4.63                     |               |                          |       |
|    |             |        |                               | NLDPEQMSQVLDAMFEK        | 108           | 0.099                    | 0.00  | 10.05                    |               |                          |       |
| 4  | IPI00766097 | 76929  | PKG I $\alpha$ / PKGI $\beta$ | CQSVLPVPSTHIGPR          | 43            | NaN                      | 0.00  | NaN                      | 312           | NaN                      | NaN   |
|    |             |        |                               | GIDMIEFPK                | 40            | NaN                      | 0.00  | NaN                      |               |                          |       |
|    |             |        |                               | LSDFNIIITLGVGGFGR        | 102           | NaN                      | 0.00  | NaN                      |               |                          |       |
|    |             |        |                               | LVDGFAK                  | 28            | NaN                      | 0.00  | NaN                      |               |                          |       |
|    |             |        |                               | SVPTFQSLPDEILSK          | 65            | NaN                      | 0.00  | NaN                      |               |                          |       |
|    |             |        |                               | VNVTREDSPEDPVFLR         | 34            | 0.225                    | 0.00  | NaN                      |               |                          |       |
| 11 | IPI00213479 | 92660  | AKAP1                         | DLSPFYEAVEGCKQESALGR     | 60            | 1.130                    | 0.00  | 0.88                     | 247           | 1.1                      | 0.31  |
|    |             |        |                               | TYVSLSSPLSGPTK           | 76            | 1.111                    | 0.00  | 0.90                     |               |                          |       |
|    |             |        |                               | VVLSLMGDEAK              | 61            | 0.702                    | 0.03  | 1.42                     |               |                          |       |
| 10 | IPI00364858 | 96338  | AKAP2                         | NLMQTLMEDYETHK           | 58            | 0.700                    | 0.00  | 1.43                     | 437           | 1.3                      | 0.33  |
|    |             |        |                               | STASLLATQESDVMVMPFK      | 37            | 1.054                    | 0.00  | 0.95                     |               |                          |       |
|    |             |        |                               | SVNVSLTQEELDGLDEL SVR    | 161           | 0.585                    | 0.50  | 1.71                     |               |                          |       |
|    |             |        |                               | TLSMIEEIRAAQEREELK       | 30            | 0.864                    | 0.00  | 1.16                     |               |                          |       |
| 8  | IPI00201274 | 96002  | AKAP3                         | SVGEVLQSVLRYEK           | 30            | 0.260                    | 0.09  | 3.85                     | 661           | 2.7                      | 1.04  |
|    |             |        |                               | EVVSDLIDSMFK             | 53            | 0.527                    | 0.09  | 1.90                     |               |                          |       |
|    |             |        |                               | FCEDEEATGGALSGLTK        | 61            | 0.440                    | 0.00  | 2.27                     |               |                          |       |
| 5  | IPI00212365 | 94916  | AKAP4                         | GAPGPSTCAKENQLESQKMDMSNM | 33            | 0.192                    | 0.00  | 5.20                     | 1823          | 3.0                      | 2.22  |
|    |             |        |                               | NLHNITGVLMTDSDFVSAVK     | 87            | 1.865                    | 0.00  | 0.54                     |               |                          |       |
|    |             |        |                               | RPEDQSQDSTEMDFISGMK      | 53            | 1.125                    | 0.00  | 0.89                     |               |                          |       |
|    |             |        |                               | SVATPDGECSDMLLSYYVNR     | 72            | 0.171                    | 0.00  | 5.84                     |               |                          |       |
|    |             |        |                               | TFLYSELSNK               | 38            | 0.236                    | 0.97  | 4.24                     |               |                          |       |
|    |             |        |                               | YALGFQHALSPASSCK         | 123           | 0.286                    | 0.05  | 3.49                     |               |                          |       |
|    |             |        |                               | YSNNGAALAELEEQAALASNGPR  | 123           | 1.142                    | 0.50  | 0.88                     |               |                          |       |
| 12 | IPI00421609 | 39621  | AKAP7                         | HLTLPFHGIGTFQGGVGFVK     | 47            | 0.327                    | 0.91  | 3.06                     | 142           | 3.5                      | 0.41  |
|    |             |        |                               | LADGDHVSALLEIAETAK       | 37            | 0.217                    | 1.79  | 4.62                     |               |                          |       |
|    |             |        |                               | LADGDHVSALLEIAETAKR      | 58            | 0.363                    | 1.19  | 2.75                     |               |                          |       |
| 14 | IPI00471827 | 74284  | AKAP10                        | SIEQDAVNTFTK             | 59            | 1.183                    | 0.12  | 1.18                     | 59            | 1.2                      | 0.00  |
| 7  | IPI00779281 | 209546 | AKAP11                        | LSPLINEACRYCDLK          | 30            | 0.151                    | 0.190 | 6.61                     | 859           | 8.2                      | 2.03  |
|    |             |        |                               | SCQPLQNHGLCQNTSSLSGYSCGE | 90            | 0.158                    | 0.01  | 6.33                     |               |                          |       |
|    |             |        |                               | SSDVSSSPLNQSHHSGMLCVMR   | 44            | 0.130                    | 0.458 | 7.67                     |               |                          |       |
|    |             |        |                               | FSASLASSITR              | 60            | 0.104                    | 0.020 | 9.59                     |               |                          |       |
|    |             |        |                               | TSVTTTISEPWTQR           | 74            | 0.090                    | 0.198 | 11.06                    |               |                          |       |
| 6  | IPI00198250 | 181514 | AKAP12                        | ALGSLGGSPSLPDQDK         | 93            | 0.705                    | 0.08  | 1.42                     | 774           | 1.7                      | 0.75  |
|    |             |        |                               | HPEGIVSEVEMLSSQER        | 75            | 0.390                    | 0.02  | 2.56                     |               |                          |       |
|    |             |        |                               | IVLNVIQTAVDQFAR          | 126           | 0.710                    | 0.12  | 1.41                     |               |                          |       |
|    |             |        |                               | AADVTYDSEVMGVAGCQEK      | 103           | 1.235                    | 0.00  | 0.81                     |               |                          |       |
|    |             |        |                               | TLVHTVSVVAIDGTR          | 85            | 0.410                    | 0.00  | 2.44                     |               |                          |       |
| 13 | IPI00213019 | 55722  | AKAP14                        | EKKVQLIDPKEK             | 24            | 0.730                    | 0.68  | 9.75                     | 41            | 9.0                      | 0.00  |
|    |             |        |                               | HILLESIPFKVV             | 25            | 0.510                    | 0.71  | 6.35                     |               |                          |       |
|    |             |        |                               | MNNKKKPPNQKAK            | 22            | 0.671                    | 0.00  | 10.13                    |               |                          |       |
|    |             |        |                               | RTVTFVTDVKDK             | 28            | 0.540                    | 0.01  | 9.35                     |               |                          |       |
|    |             |        |                               | VVLTPEIK                 | 48            | 0.200                    | 0.00  | 9.39                     |               |                          |       |
| 9  | IPI00231052 | 49327  | MAP2                          | APHWTSASLTEAAAHPHSPENK   | 60            | 0.146                    | 0.00  | 6.85                     | 417           | 6.2                      | 1.95  |
|    |             |        |                               | ENGINELTADRETAEEVSAR     | 61            | 0.130                    | 0.00  | 7.71                     |               |                          |       |
|    |             |        |                               | RGVSGDREENSFSLNSSISSAR   | 36            | 0.251                    | 0.00  | 3.99                     |               |                          |       |
| 15 | IPI00213904 | 97084  | PDE10A11                      | FNREVDLYTGYYTR           | 51            | 0.000                    | 0.00  | 0.02                     | 92            | 0.0                      | 0.00  |
|    |             |        |                               | GSVIGVVQMVNK             | 72            | 0.146                    | 0.08  | 0.00                     |               |                          |       |
|    |             |        |                               | LTANDIYAEFWAEGDEMCK      | 35            | 0.130                    | 0.11  | 0.00                     |               |                          |       |
|    |             |        |                               | NILCMPIVSR               | 38            | 0.251                    | 0.02  | 0.00                     |               |                          |       |
|    |             |        |                               | TGEVLNIPDAYADPR          | 51            | 0.100                    | 0.00  | 0.00                     |               |                          |       |
|    |             |        |                               | TLLVEDILGDERFFPR         | 57            | 0.100                    | 0.00  | 0.00                     |               |                          |       |
|    |             |        |                               | VIRGEETAMWISGPATSK       | 35            | 0.100                    | 0.00  | 0.00                     |               |                          |       |
| 16 | IPI00779862 | 40233  | A-kinase anchoring protein-as | AIVDLDPSEDKMEWIK         | 63            | 0.000                    | 0.00  | 6.04                     | 255           | 6.6                      | 0.78  |
|    |             |        |                               | FLALGCSSLGGTLNTAMK       | 104           | 0.000                    | 0.00  | 7.14                     |               |                          |       |

|    |             |        |                                 |                          |     |        |       |        |        |      |       |
|----|-------------|--------|---------------------------------|--------------------------|-----|--------|-------|--------|--------|------|-------|
| 17 | IPI00189795 | 50788  | Tuba1 Tubulin alpha-1 chain     | IHFPLATYAPVISA EK        | 52  | 0.166  | 0.00  | 6.04   | 637    | 13.1 | 11.36 |
|    |             |        |                                 | NLDIERPTYTNLNR           | 39  | 0.140  | 0.00  | 7.14   |        |      |       |
|    |             |        |                                 | TIGGGDDSFNTFFSETGAGK     | 115 | 0.038  | 0.01  | 26.24  |        |      |       |
| 18 | IPI00207355 | 69771  | Hspa2 Heat shock-related 70     | ARFEELNADLFR             | 55  | 0.166  | 0.00  | 6.03   | 69642  | 24.6 | 26.28 |
|    |             |        |                                 | NQVAMNPTNTIFDAKR         | 90  | 0.223  | 0.00  | 4.49   |        |      |       |
|    |             |        |                                 | TTPSYVAFDTERLIGDAAK      | 48  | 0.037  | 0.00  | 27.04  |        |      |       |
|    |             |        |                                 | VQSAVITVPAYFNDSQR        | 67  | 0.016  | 0.00  | 60.89  |        |      |       |
| 19 | IPI00400573 | 50225  | Tubb2c Tubulin beta-2C chain    | AVLVLEPGTMDSVR           | 26  | 0.217  | 0.00  | 4.60   | 49801  | 7.9  | 3.46  |
|    |             |        |                                 | GHYTEGAELVDSVLDVVRK      | 26  | 0.087  | 0.00  | 11.49  |        |      |       |
|    |             |        |                                 | NSSYFVEWIPNNVK           | 60  | 0.132  | 0.11  | 7.56   |        |      |       |
| 20 | IPI00197711 | 36712  | Ldha L-lactate dehydrogenase    | DLADELALVDVIEDK          | 97  | 0.305  | 0.03  | 3.28   | 36451  | 1.0  | 0.98  |
|    |             |        |                                 | DLADELALVDVIEDKLNK       | 74  | 0.558  | 0.00  | 1.79   |        |      |       |
|    |             |        |                                 | QVVDSAYEVIKLNK           | 72  | 0.699  | 0.00  | 1.43   |        |      |       |
| 21 | IPI00201032 | 38339  | Hnrpd Isoform 1 of Heterogen    | FGDVVDCTLKLDPITGR        | 70  | 0.131  | 0.02  | 7.64   | 38192  | 20.5 | 0.02  |
|    |             |        |                                 | MFIGLSDWDTTKK            | 66  | 0.030  | 0.00  | 33.33  |        |      |       |
| 22 | IPI00362587 | 52870  | Fus Fusion, derived from t(12;  | AAIDWFDGKEFSGNPIK        | 88  | 0.040  | 0.00  | 25.00  | 52673  | 24.1 | 0.00  |
|    |             |        |                                 | LKGEATVFSFDPPSAK         | 46  | 0.035  | 0.00  | 28.57  |        |      |       |
|    |             |        |                                 | TGQPMINLYTDRETGK         | 63  | 0.054  | 0.04  | 18.65  |        |      |       |
| 23 | IPI00197579 | 50095  | Tubb5 Isoform 1 of Tubulin be   | ALVLEPGTMDSVR            | 27  | 0.023  | 0.01  | 44.28  | 49671  | 18.4 | 0.00  |
|    |             |        |                                 | ALTVPELTQQVFDK           | 68  | 0.169  | 0.01  | 5.92   |        |      |       |
|    |             |        |                                 | ISVYYNEATGGKYVPR         | 77  | 0.200  | 0.01  | 5.00   |        |      |       |
| 24 | IPI00200047 | 69622  | Rbm14 similar to RNA-binding    | ASYVAPLTAQATYR           | 71  | 0.100  | 0.00  | 10.00  | 69494  | 31.2 | 0.02  |
|    |             |        |                                 | IFVGNVSAACTSQELR         | 110 | 0.030  | 0.02  | 33.51  |        |      |       |
| 25 | IPI00191692 | 37623  | Tfg 38 kDa protein              | NVMSAFGLTDDQVSGPPSAPTE   | 104 | 0.020  | 0.00  | 50.00  | 37589  | 37.4 | 0.00  |
|    |             |        |                                 | QSTQVMAASMSAFDPLK        | 87  | 0.030  | 0.00  | 33.33  |        |      |       |
|    |             |        |                                 | QSTQVMAASMSAFDPLKNQDEIN  | 77  | 0.035  | 0.02  | 28.73  |        |      |       |
| 26 | IPI00206780 | 93214  | Plg Plasminogen precursor       | ILGSDVQQIAVTK            | 73  | 0.055  | 0.01  | 18.28  | 90536  | 35.3 | 0.09  |
|    |             |        |                                 | NYCRNPDGDVNGPWCYTMNPR    | 77  | 0.020  | 0.00  | 50.00  |        |      |       |
|    |             |        |                                 | VVGGCVANPHSWPWQISLR      | 75  | 0.027  | 0.01  | 37.51  |        |      |       |
| 27 | IPI00363176 | 40735  | Zadh2_predicted similar to zin  | DCPVPLPGDGLLVR           | 40  | 0.020  | 0.00  | 50.00  | 40476  | 74.8 | 0.04  |
|    |             |        |                                 | FVGINASDINYSAGR          | 70  | 0.006  | 0.00  | 167.17 |        |      |       |
|    |             |        |                                 | LIVIGFISGYSPTGLSPVK      | 66  | 0.137  | 0.00  | 7.29   |        |      |       |
|    |             |        |                                 | LSPNFHEAVTLRR            | 36  | 0.166  | 0.07  | 6.03   |        |      |       |
|    |             |        |                                 | LVVELPHPVSSKL            | 41  | 0.060  | 0.00  | 16.61  |        |      |       |
| 28 | IPI00554039 | 36045  | GAPDH                           | IVSNASCTTINCLAPLAK       | 91  | 0.026  | 0.01  | 38.13  | 35783  | 19.0 | 0.00  |
|    |             |        |                                 | LISWYDNEYGYSNR           | 74  | 0.122  | 0.00  | 8.20   |        |      |       |
| 29 | IPI00326948 | 81551  | Hsd17b4 Hsd17b4 protein         | AAVAVPSRPPDAVLR          | 26  | 0.094  | 0.02  | 10.60  | 81089  | 18.5 | 0.24  |
|    |             |        |                                 | AAVAVPSRPPDAVLRDTTSLNQAA | 26  | 0.040  | 0.00  | 25.04  |        |      |       |
|    |             |        |                                 | GALVVVNDLGGDFK           | 65  | 0.050  | 0.00  | 20.00  |        |      |       |
| 30 | IPI00464815 | 47440  | Eno1 Alpha-enolase              | AAVPSGASTGIYEALERLDNDK   | 57  | 0.079  | 0.04  | 12.72  | 47128  | 9.1  | 5.37  |
|    |             |        |                                 | LAMQEFMILPVGASSFR        | 93  | 0.087  | 0.00  | 11.50  |        |      |       |
|    |             |        |                                 | LAQSNQWGVVMVSHR          | 47  | 0.337  | 0.23  | 2.97   |        |      |       |
|    |             |        |                                 | VNIGSVTESLQACK           | 47  | 0.744  | 0.35  | 1.34   |        |      |       |
| 31 | IPI00382376 | 39856  | Hnrpa3 Isoform 1 of Heteroge    | IFVGGIKEDTEYNLRDYEFEK    | 41  | 0.354  | 0.00  | 2.83   | 39652  | 2.5  | 0.23  |
|    |             |        |                                 | YGKIEIEMEDR              | 51  | 0.222  | 0.00  | 4.50   |        |      |       |
| 32 | IPI00365665 | 96513  | Hnrp11_predicted similar to E   | EALGGQALYPHVLVK          | 87  | 17.287 | 25.40 | 0.06   | 96002  | 50.6 | 0.00  |
|    |             |        |                                 | KYNILGTNAIMDK            | 37  | 0.007  | 0.00  | 149.10 |        |      |       |
|    |             |        |                                 | NYILDQTNVYGSQR           | 44  | 0.384  | 0.00  | 2.60   |        |      |       |
| 33 | IPI00421395 | 33918  | RGD1304704_LRRGT00192           | HILGFDTGDVNLNEAAQILR     | 95  | 0.059  | 0.00  | 16.85  | 33825  | 6.0  | 0.00  |
|    |             |        |                                 | LLHIEELRELQTK            | 57  | 1.520  | 0.00  | 0.66   |        |      |       |
| 34 | IPI00364132 | 74882  | Taf15_predicted similar to TA   | AAIDWFDGKEFHGNIK         | 86  | 1.638  | 1.26  | 0.61   | 74643  | 3.3  | 0.00  |
|    |             |        |                                 | NGDWVCPNPNPSCGNMNFAR     | 66  | 1.200  | 0.00  | 0.83   |        |      |       |
| 35 | IPI00208098 | 29969  | Gpx4 Phospholipid hydroperox    | ICVNGDDAHLPLWK           | 61  | 0.117  | 0.00  | 8.53   | 29304  | 8.9  | 0.18  |
|    |             |        |                                 | QEPGNSQEIKEFAAGYNVR      | 78  | 0.110  | 0.00  | 9.09   |        |      |       |
|    |             |        |                                 | TDVNYTQLVDLHAR           | 80  | 0.110  | 0.00  | 9.09   |        |      |       |
| 36 | IPI00213546 | 70904  | Hspa11_mapped;Hspa11 Heat       | LVSHFVEEFK               | 24  | 0.156  | 0.06  | 6.40   | 70549  | 4.1  | 0.00  |
|    |             |        |                                 | NQVAMNPQNTVFDK           | 45  | 0.320  | 0.00  | 3.13   |        |      |       |
| 37 | IPI00208659 | 144814 | Cfh Complement inhibitory fac   | CIKTDCDNLPTFEIAKPTK      | 33  | 0.378  | 0.00  | 2.64   | 140344 | 5.4  | 0.00  |
|    |             |        |                                 | CTITGWIPAPR              | 49  | 0.122  | 0.00  | 8.20   |        |      |       |
| 38 | IPI00231783 | 36874  | Ldha L-lactate dehydrogenase    | MVDSAYEVIK               | 35  | 1.000  | 0.00  | 1.00   | 36612  | 4.9  | 0.00  |
|    |             |        |                                 | MVDSAYEVIKLNK            | 49  | 0.094  | 0.00  | 10.67  |        |      |       |
| 39 | IPI00464822 | 36089  | Ldha Lactate dehydrogenase      | SCDILWNIQK               | 45  | 0.330  | 0.00  | 3.03   | 35713  | 3.6  | 0.33  |
|    |             |        |                                 | VNMNTEEEALFKK            | 47  | 0.410  | 0.00  | 2.44   |        |      |       |
| 40 | IPI00337168 | 58576  | Cct4 T-complex protein 1 subu   | VIDPATATSVDLR            | 47  | 0.183  | 0.00  | 5.47   | 58099  | 3.1  | 0.00  |
|    |             |        |                                 | GIHPTIIESEFOK            | 49  | 0.400  | 0.00  | 2.50   |        |      |       |
|    |             |        |                                 | VVSQYSLLSPMSVNAVMMK      | 32  | 0.804  | 0.63  | 1.24   |        |      |       |
| 41 | IPI00325713 | 61130  | Cyp11a1 Cytochrome P450 11      | DHAAAWDVIFSK             | 35  | 0.128  | 0.06  | 7.81   | 60941  | 8.4  | 0.00  |
|    |             |        |                                 | NFVPLLEGVAQDFIK          | 62  | 0.122  | 0.00  | 8.20   |        |      |       |
| 42 | IPI00210090 | 88492  | Hnrpu SP120                     | GYFEYIEENK               | 41  | 0.110  | 0.00  | 9.09   | 87748  | 6.8  | 0.16  |
|    |             |        |                                 | SSGPTSLFAVTVAPPGAR       | 56  | 0.120  | 0.00  | 8.33   |        |      |       |
| 43 | IPI00554081 | 55549  | RGD1305486 Protein FAM98        | GNISIAHLAAR              | 70  | 0.320  | 0.00  | 3.13   | 55070  | 2.7  | 0.00  |
|    |             |        |                                 | LCAWLVSCLR               | 55  | 0.385  | 0.00  | 2.60   |        |      |       |
| 44 | IPI00231134 | 35853  | Gnb2l1 Guanine nucleotide-bir   | LWNLTGVCK                | 34  | 0.404  | 0.00  | 2.48   | 35419  | 3.6  | 0.00  |
|    |             |        |                                 | YTVQDESHSEWVSCVR         | 72  | 0.173  | 0.00  | 5.79   |        |      |       |
| 45 | IPI00194567 | 90667  | Trim28 similar to Transcription | ADVQSIIGLQR              | 66  | 0.410  | 0.00  | 2.44   | 88956  | 2.8  | 0.15  |
|    |             |        |                                 | IVAERPNTSTGPGMAPPRAPG    | 29  | 0.441  | 0.00  | 2.27   |        |      |       |
|    |             |        |                                 | LTEKADVQSIIGLQR          | 41  | 0.260  | 0.00  | 3.84   |        |      |       |
| 46 | IPI00200121 | 117152 | Man2c1 Alpha-mannosidase        | FVSPYFTDCNLR             | 62  | 0.340  | 0.00  | 2.94   | 115971 | 3.0  | 0.00  |
|    |             |        |                                 | LTFSPFQVR                | 28  | 0.394  | 0.00  | 2.53   |        |      |       |
| 47 | IPI00763620 | 45554  | RGD1564209_predicted simil      | AAQLFGGIYVR              | 34  | 0.285  | 0.00  | 3.51   | 44784  | 4.9  | 0.00  |
|    |             |        |                                 | SQYLQFLADMATK            | 47  | 0.183  | 0.00  | 5.46   |        |      |       |

|    |             |        |                               |                      |    |       |      |      |        |     |      |
|----|-------------|--------|-------------------------------|----------------------|----|-------|------|------|--------|-----|------|
| 48 | IPI00734566 | 135981 | Mttr3 Myotubularin related pr | SHLDDDGMPVYDTIQQR    | 51 | 0.172 | 0.00 | 5.81 | 133500 | 4.0 | 0.00 |
|    |             |        |                               | SRLESQYLSSLR         | 35 | 0.200 | 0.00 | 5.00 |        | 2.4 |      |
| 49 | IPI00365961 | 43287  | Dazap1 DAZ associated prote   | IFVGGIPHNCGETELREYFK | 32 | 0.930 | 0.00 | 1.08 | 43086  | 1.1 | 0.00 |
|    |             |        |                               | LFVGGLDWSTTQETLR     | 37 | 0.904 | 0.00 | 1.11 |        | 1.1 |      |
